# Supplementary material
Source: PubMed Central journal article supplement (PMC4747717)
Supplement: pnas.1524677113.sapp.pdf [file pnas.1524677113.sapp.pdf]

*Classification:* BIOLOGICAL SCIENCES: Immunology

**Subtype Specific Addiction of the Activated B Cell Subset of Diffuse Large B Cell Lymphoma to FOXP1**

Joseph D. Dekker<sup>a</sup>, Daechan Park<sup>a,b</sup>, Arthur L. Shaffer III<sup>c</sup>, Holger Kohlhammer<sup>c</sup>, Wei Deng<sup>a</sup>, Bum-Kyu Lee<sup>a</sup>, Gregory C. Ippolito<sup>a,b</sup>, George Georgiou<sup>a,b</sup>, Vishwanath R. Iyer<sup>a</sup>, Louis M. Staudt<sup>c</sup>, Haley O. Tucker<sup>a1</sup>

Supporting Information

Supplemental Methods  
Tables S1-S5  
Figures S1-S12

## **Supplemental methods**

### **shRNA knockdown**

Sequences of the 21bp DNA stems of the shRNAs used were: #26 GGCGGTCCAACGGAGAGACGC, #36 GACCTCGCCCACGCCCAGCAG, and #42 GCAGCAACAGTGGCATCTCAT, or an ineffective non-specific control shRNA. Doxycycline (1-10  $\mu\text{g}/\text{mL}$ ) was applied for induction of shRNA expression in each experiment. Human FOXP1 primers were: F: 5'-AAAACATGCAGAGCAGCCAC-3', and R: 5'- TGGCTAAGTTGCCCAGAGTG-3'.

### **Flow cytometry**

Anti-human antibodies used in this study were: Annexin V conjugated to PE (BD Biosciences, cat. #640908), pan-MHC class II antibody conjugated to AlexaFluor 647 (BioLegend, clone Tu39), and anti-IgM F(ab')<sub>2</sub> antibody conjugated to R-PE (Invitrogen, cat. #H15104) were used.

### **Western blots**

anti-FOXP1 Rabbit polyclonal antisera was kindly provided by Dr. Edward Morrissey (U. Penn), Anti-IKK $\beta$  and anti phospho-IKK $\alpha/\beta$  antibodies from Cell Signaling Technologies (clones D30C6 and 16A6) and IRAK 1 and 4 antibodies from Santa Cruz Biotechnology (Cat #'s sc-7883 and sc-374349).

### **Data analysis**

Sequencing reads were trimmed to 35nt due to low base qualities, then the trimmed reads were mapped onto the hg19 reference genome using the Burrows-Wheeler Aligner (BWA, version 0.6.2)(1). Non-uniquely mapped reads were filtered out to eliminate bogus peaks on repeat regions. Then, a Parzen window density estimation algorithm was used to call peaks(2). For each peak site, a binomial P-value was calculated by comparing to the same locus in the corresponding input data. By applying FDR-corrected P value cutoff 0.001, the highest number of significant peaks among cell

lines was 5452 in TMD8. The same number of top peaks (5452) were considered FOXP1 targets in all cell lines. Assignment of peaks to target genes was performed using GREAT version 2.0.2(3). Genes qualifying in array and ChIP-seq analysis were considered direct targets. Gene expression signature enrichment was performed as described(4). GO terms were identified by DAVID analysis(5, 6).

Five gene lists (defined in Fig. 7B) of FOXP1 direct and/or indirect targets derived from GREAT analysis(3) of ChIP-seq data and/or from modulated microarray genes (log<sub>2</sub> values of  $\pm 0.3$  change in at least 5 out of 12 KD samples) were pre-defined. Transcriptome RNA-seq of human primary DLBCL were obtained from the dbGaP database (accession number: phs000235). FPKM was calculated by using TopHat2 and Cufflinks(7, 8). Two subtypes, ABC (n=32) or GCB (n=53), were determined based on a previous study(9, 10), then the expression data were split by subtypes. For each subtype, Gene Set Enrichment Analysis (GSEA)(11) was used to rank genes by correlation with *FOXP1* expression and to evaluate the enrichment of the pre-defined five gene sets. The highly enriched (correlated) FOXP1 targets were further used for downstream analysis. Hierarchical clustering by Pearson correlation was performed on the genes enriched in either ABC or GCB subtypes, and heat maps were made with GENE-E(12).

1. Li H, Durbin R. Fast and accurate short read alignment with Burrows-Wheeler transform. *Bioinformatics* (Oxford, England). 2009;25(14):1754-60.
2. Lee BK, Bhinge AA, Iyer VR. Wide-ranging functions of E2F4 in transcriptional activation and repression revealed by genome-wide analysis. *Nucleic Acids Res.* 2011;39(9):3558-73.
3. McLean CY, Bristor D, Hiller M, Clarke SL, Schaar BT, Lowe CB, et al. GREAT improves functional interpretation of cis-regulatory regions. *Nature biotechnology.* 2010;28(5):495-501.
4. Yang Y, Shaffer AL, 3rd, Emre NC, Ceribelli M, Zhang M, Wright G, et al. Exploiting synthetic lethality for the therapy of ABC diffuse large B cell lymphoma. *Cancer Cell.* 2012;21(6):723-37.

5. Huang DW, Sherman BT, Lempicki RA. Systematic and integrative analysis of large gene lists using DAVID bioinformatics resources. *Nat Protoc.* 2009;4(1):44-57.
6. Huang DW, Sherman BT, Lempicki RA. Bioinformatics enrichment tools: paths toward the comprehensive functional analysis of large gene lists. *Nucleic Acids Res.* 2009;37(1):1-13.
7. Kim D, Pertea G, Trapnell C, Pimentel H, Kelley R, Salzberg SL. TopHat2: accurate alignment of transcriptomes in the presence of insertions, deletions and gene fusions. *Genome Biol.* 2013;14(4):R36.
8. Trapnell C, Hendrickson DG, Sauvageau M, Goff L, Rinn JL, Pachter L. Differential analysis of gene regulation at transcript resolution with RNA-seq. *Nature biotechnology.* 2013;31(1):46-53.
9. Morin RD, Mendez-Lago M, Mungall AJ, Goya R, Mungall KL, Corbett RD, et al. Frequent mutation of histone-modifying genes in non-Hodgkin lymphoma. *Nature.* 2011;476(7360):298-303.
10. Morin RD, Johnson NA, Severson TM, Mungall AJ, An J, Goya R, et al. Somatic mutations altering EZH2 (Tyr641) in follicular and diffuse large B-cell lymphomas of germinal-center origin. *Nat Genet.* 2010;42(2):181-5.
11. Mootha VK, Lindgren CM, Eriksson KF, Subramanian A, Sihag S, Lehar J, et al. PGC-1alpha-responsive genes involved in oxidative phosphorylation are coordinately downregulated in human diabetes. *Nat Genet.* 2003;34(3):267-73.
12. <http://www.broadinstitute.org/cancer/software/GENE-E/>. GENE-E.

**Table S1: GO Terms (27) of FOXP1 motif "TGTT" bound target genes.****ABC only****Common pathways****GCB only**

| ABC significant GO terms                                                                 | Count | %           | p value     | Overlap GO terms by p value                                                                             | count | %           | p value     | GCB GO terms by p value                                      | Count | %           | p value     |
|------------------------------------------------------------------------------------------|-------|-------------|-------------|---------------------------------------------------------------------------------------------------------|-------|-------------|-------------|--------------------------------------------------------------|-------|-------------|-------------|
| GO:0003714~transcription corepressor activity                                            | 17    | 3.03030303  | 1.40E-05    | GO:0010628~positive regulation of gene expression                                                       | 47    | 7.605177994 | 7.82E-07    | GO:0042981~regulation of apoptosis                           | 59    | 9.546925566 | 6.01E-07    |
| BP00152:B-cell- and antibody-mediated immunity                                           | 13    | 2.317290553 | 1.76E-05    | GO:0045941~positive regulation of transcription                                                         | 45    | 7.281553398 | 2.04E-06    | GO:0043067~regulation of programmed cell death               | 59    | 9.546925566 | 8.37E-07    |
| GO:0006350~transcription                                                                 | 100   | 17.82531194 | 8.33E-05    | GO:0045893~positive regulation of transcription, DNA-dependent                                          | 40    | 6.472491909 | 2.57E-06    | GO:0010941~regulation of cell death                          | 59    | 9.546925566 | 9.42E-07    |
| GO:0010553~negative regulation of specific transcription from RNA polymerase II promoter | 8     | 1.426024955 | 3.34E-04    | GO:0006357~regulation of transcription from RNA polymerase II promoter                                  | 53    | 8.57605178  | 3.08E-06    | GO:0043066~negative regulation of apoptosis                  | 31    | 5.01618123  | 1.91E-05    |
| MF00101:Guanyl-nucleotide exchange factor                                                | 13    | 2.317290553 | 6.47E-04    | GO:0051254~positive regulation of RNA metabolic process                                                 | 40    | 6.472491909 | 3.16E-06    | GO:0043069~negative regulation of programmed cell death      | 31    | 5.01618123  | 2.50E-05    |
| GO:0032582~negative regulation of gene-specific transcription                            | 8     | 1.426024955 | 8.99E-04    | GO:0051173~positive regulation of nitrogen compound metabolic process                                   | 48    | 7.766990291 | 5.67E-06    | GO:0060548~negative regulation of cell death                 | 31    | 5.01618123  | 2.60E-05    |
| GO:0035239~tube morphogenesis                                                            | 13    | 2.317290553 | 9.55E-04    | GO:0045935~positive regulation of nucleobase, nucleoside, nucleotide and nucleic acid metabolic process | 46    | 7.443365696 | 1.21E-05    | GO:0006916~anti-apoptosis                                    | 21    | 3.398058252 | 7.47E-05    |
| GO:0010551~regulation of specific transcription from RNA polymerase II promoter          | 11    | 1.960784314 | 0.001009536 | GO:0045944~positive regulation of transcription from RNA polymerase II promoter                         | 32    | 5.177993528 | 1.84E-05    | GO:0008289~lipid binding                                     | 32    | 5.177993528 | 4.96E-04    |
| GO:0046983~protein dimerization activity                                                 | 32    | 5.704099822 | 0.001064851 | GO:0031328~positive regulation of cellular biosynthetic process                                         | 48    | 7.766990291 | 2.76E-05    | GO:0005543~phospholipid binding                              | 17    | 2.750809061 | 7.34E-04    |
| GO:0003713~transcription coactivator activity                                            | 17    | 3.03030303  | 0.001297438 | BP00281:Oncogenesis                                                                                     | 32    | 5.177993528 | 2.93E-05    | GO:0002252~immune effector process                           | 14    | 2.265372168 | 0.001329072 |
| GO:0003677~DNA binding                                                                   | 99    | 17.64705882 | 0.001353452 | GO:0010604~positive regulation of macromolecule metabolic process                                       | 56    | 9.061488673 | 3.72E-05    | GO:0030522~intracellular receptor-mediated signaling pathway | 10    | 1.618122977 | 0.001674013 |
| GO:0006914~autophagy                                                                     | 7     | 1.247771836 | 0.001367184 | GO:0010557~positive regulation of macromolecule biosynthetic process                                    | 46    | 7.443365696 | 3.87E-05    | GO:0002444~myeloid leukocyte mediated immunity               | 5     | 0.809061489 | 0.00179167  |
| GO:0040012~regulation of locomotion                                                      | 16    | 2.852049911 | 0.001679807 | GO:0009891~positive regulation of biosynthetic process                                                  | 48    | 7.766990291 | 3.98E-05    | GO:0042127~regulation of cell proliferation                  | 46    | 7.443365696 | 0.002142707 |
| GO:0046982~protein heterodimerization activity                                           | 16    | 2.852049911 | 0.002574275 | GO:0010558~negative regulation of macromolecule biosynthetic process                                    | 39    | 6.310679612 | 1.29E-04    | GO:0006816~calcium ion transport                             | 14    | 2.265372168 | 0.002243082 |
| MF00100:G-protein modulator                                                              | 22    | 3.921568627 | 0.003227279 | GO:0009890~negative regulation of biosynthetic process                                                  | 40    | 6.472491909 | 1.60E-04    | GO:0007507~heart development                                 | 18    | 2.912621359 | 0.002533419 |
| MF00039:Other transcription factor                                                       | 21    | 3.743315508 | 0.003399324 | GO:0031327~negative regulation of cellular biosynthetic process                                         | 39    | 6.310679612 | 2.13E-04    | GO:0019899~enzyme binding                                    | 33    | 5.339805825 | 0.0028091   |
| P00057:Wnt signaling pathway                                                             | 23    | 4.099821747 | 0.00410791  | BP00102:Signal transduction                                                                             | 143   | 23.13915858 | 2.23E-04    | BP00121:Steroid hormone-mediated signaling                   | 7     | 1.132686084 | 0.002828163 |
| GO:0019898~extrinsic to membrane                                                         | 27    | 4.812834225 | 0.004346414 | GO:0010605~negative regulation of macromolecule metabolic process                                       | 47    | 7.605177994 | 2.77E-04    | GO:0006974~response to DNA damage stimulus                   | 26    | 4.207119741 | 0.002901731 |
| GO:0032583~regulation of gene-specific transcription                                     | 12    | 2.139037433 | 0.004627434 | GO:0006915~apoptosis                                                                                    | 40    | 6.472491909 | 4.39E-04    | GO:0006325~chromatin organization                            | 26    | 4.207119741 | 0.003455069 |
| GO:0008633~activation of pro-apoptotic gene products                                     | 5     | 0.891265597 | 0.005234682 | GO:0010629~negative regulation of gene expression                                                       | 35    | 5.663430421 | 4.90E-04    | GO:0048732~gland development                                 | 13    | 2.103559871 | 0.004151011 |
| GO:0016585~chromatin remodeling complex                                                  | 8     | 1.426024955 | 0.005482344 | GO:0012501~programmed cell death                                                                        | 40    | 6.472491909 | 5.84E-04    | GO:0002443~leukocyte mediated immunity                       | 10    | 1.618122977 | 0.004297797 |
| GO:0007264~small GTPase mediated signal transduction                                     | 20    | 3.565062389 | 0.00577331  | GO:0045934~negative regulation of nucleobase, nucleoside, nucleotide and nucleic acid metabolic process | 35    | 5.663430421 | 6.53E-04    | MF00101:Guanyl-nucleotide exchange factor                    | 12    | 1.941747573 | 0.004988963 |
| GO:0008287~protein serine/threonine phosphatase complex                                  | 6     | 1.069518717 | 0.006751145 | BP00111:Intracellular signaling cascade                                                                 | 47    | 7.605177994 | 6.96E-04    | GO:0045165~cell fate commitment                              | 13    | 2.103559871 | 0.005244571 |
| MF00275:Transcription cofactor                                                           | 12    | 2.139037433 | 0.007082367 | BP00207:Cell cycle control                                                                              | 27    | 4.368932039 | 7.65E-04    | MF00100:G-protein modulator                                  | 23    | 3.721682848 | 0.005550641 |
| BP00040:mRNA transcription                                                               | 72    | 12.8342246  | 0.007768854 | GO:0051172~negative regulation of nitrogen compound metabolic process                                   | 35    | 5.663430421 | 8.28E-04    | GO:0015674~di-, tri-valent inorganic cation transport        | 15    | 2.427184466 | 0.005571491 |
| GO:0007229~integrin-mediated signaling pathway                                           | 8     | 1.426024955 | 0.007907233 | GO:0016481~negative regulation of transcription                                                         | 32    | 5.177993528 | 8.47E-04    | MF00229:Extracellular matrix linker protein                  | 5     | 0.809061489 | 0.005887274 |
| GO:0005955~calcineurin complex                                                           | 3     | 0.534759358 | 0.008562244 | GO:0045321~leukocyte activation                                                                         | 20    | 3.236245955 | 0.00157883  | BP00224:Cell proliferation and differentiation               | 48    | 7.766990291 | 0.006121618 |
| hsa04310:Wnt signaling pathway                                                           | 12    | 2.139037433 | 0.009103859 | GO:0043087~regulation of GTPase activity                                                                | 13    | 2.103559871 | 0.001917185 | GO:0045884~regulation of survival gene product expression    | 5     | 0.809061489 | 0.006595219 |
| GO:0008283~cell proliferation                                                            | 25    | 4.456327986 | 0.009244591 | GO:0008219~cell death                                                                                   | 43    | 6.957928803 | 0.002031497 | BP00273:Chromatin packaging and remodeling                   | 14    | 2.265372168 | 0.006709616 |

**DLBCL pathways modulated in ABC lines by FOXP1 loss**

**Repressed**

**Activated**

**DLBCL pathways modulated And with ChIP-seq peaks**

**Repressed**

**Activated**

| Signature  | SIG.size | GENE list                       | List.size | Intersection | p value  | Enrichment | Conf. Interval |
|------------|----------|---------------------------------|-----------|--------------|----------|------------|----------------|
| MYD88Dn-1  | 279      | HBL1.and.TMD8.GE_up             | 553       | 68           | 4.58E-44 | 8.609      | 6.456          |
| JAK2Dn-1   | 402      | HBL1.and.TMD8.GE_up             | 553       | 49           | 5.67E-18 | 4.306      | 3.153          |
| GCBDLBCL-3 | 273      | HBL1.and.TMD8.GE_up             | 553       | 35           | 7.99E-14 | 4.529      | 3.142          |
| BCL6-5     | 1163     | HBL1.and.TMD8.GE_up             | 553       | 73           | 1.26E-10 | 2.217      | 1.720          |
| GCB-1      | 289      | HBL1.and.TMD8.GE_up             | 553       | 31           | 2.21E-10 | 3.789      | 2.584          |
| GCB-6      | 210      | HBL1.and.TMD8.GE_up             | 553       | 26           | 2.89E-10 | 4.373      | 2.874          |
| Module-3.4 | 280      | HBL1.and.TMD8.GE_up             | 553       | 28           | 8.02E-09 | 3.532      | 2.368          |
| IL10Up-1   | 121      | HBL1.and.TMD8.GE_up             | 553       | 18           | 8.87E-09 | 5.255      | 3.162          |
| MM-4       | 47       | HBL1.and.TMD8.GE_up             | 553       | 11           | 5.86E-08 | 8.267      | 4.186          |
| IFN-3      | 304      | HBL1.and.TMD8.GE_up             | 553       | 27           | 1.74E-07 | 3.137      | 2.093          |
| MYD88Up-1  | 271      | HBL1.and.TMD8.GE_down           | 563       | 80           | 2.25E-58 | 10.242     | 7.771          |
| JAK2Up-1   | 945      | HBL1.and.TMD8.GE_down           | 563       | 121          | 1.06E-45 | 4.443      | 3.591          |
| NFkB-10    | 206      | HBL1.and.TMD8.GE_down           | 563       | 45           | 7.36E-27 | 7.579      | 5.385          |
| MYD88Up-2  | 91       | HBL1.and.TMD8.GE_down           | 563       | 26           | 3.59E-19 | 9.913      | 6.240          |
| JAKUp-2    | 322      | HBL1.and.TMD8.GE_down           | 563       | 36           | 3.75E-12 | 3.879      | 2.714          |
| MYD88Up-3  | 46       | HBL1.and.TMD8.GE_down           | 563       | 14           | 2.39E-11 | 10.560     | 5.603          |
| NFkB-9     | 63       | HBL1.and.TMD8.GE_down           | 563       | 14           | 2.37E-09 | 7.710      | 4.232          |
| IRF4Up-2   | 176      | HBL1.and.TMD8.GE_down           | 563       | 18           | 3.52E-06 | 3.548      | 2.163          |
| ABCDLBCL-4 | 261      | HBL1.and.TMD8.GE_down           | 563       | 22           | 7.47E-06 | 2.925      | 1.874          |
| Prolif-5   | 645      | HBL1.and.TMD8.GE_down           | 563       | 39           | 1.87E-05 | 2.098      | 1.500          |
| BCL6-5     | 1163     | HBL1.and.TMD8.GE.plus.peak_up   | 127       | 36           | 1.44E-15 | 4.761      | 3.222          |
| BCL6-6     | 4357     | HBL1.and.TMD8.GE.plus.peak_up   | 127       | 68           | 2.61E-14 | 2.401      | 1.691          |
| MYD88Dn-1  | 279      | HBL1.and.TMD8.GE.plus.peak_up   | 127       | 18           | 2.86E-13 | 9.923      | 5.939          |
| IL10Up-1   | 121      | HBL1.and.TMD8.GE.plus.peak_up   | 127       | 10           | 6.49E-09 | 12.712     | 6.491          |
| GCB-6      | 210      | HBL1.and.TMD8.GE.plus.peak_up   | 127       | 12           | 1.27E-08 | 8.789      | 4.772          |
| BCL6-4     | 2727     | HBL1.and.TMD8.GE.plus.peak_up   | 127       | 43           | 1.53E-08 | 2.425      | 1.676          |
| GCB-1      | 289      | HBL1.and.TMD8.GE.plus.peak_up   | 127       | 13           | 5.25E-08 | 6.919      | 3.851          |
| JAK2Dn-1   | 402      | HBL1.and.TMD8.GE.plus.peak_up   | 127       | 15           | 5.56E-08 | 5.739      | 3.317          |
| GCBDLBCL-3 | 273      | HBL1.and.TMD8.GE.plus.peak_up   | 127       | 12           | 2.25E-07 | 6.761      | 3.685          |
| GCB-3      | 50       | HBL1.and.TMD8.GE.plus.peak_up   | 127       | 6            | 8.43E-07 | 18.457     | 7.721          |
| MYD88Up-1  | 271      | HBL1.and.TMD8.GE.plus.peak_down | 113       | 23           | 1.39E-20 | 14.671     | 9.126          |
| JAK2Up-1   | 945      | HBL1.and.TMD8.GE.plus.peak_down | 113       | 24           | 7.21E-10 | 4.390      | 2.784          |
| NFkB-10    | 206      | HBL1.and.TMD8.GE.plus.peak_down | 113       | 10           | 3.30E-07 | 8.392      | 4.319          |
| BCL6-5     | 1163     | HBL1.and.TMD8.GE.plus.peak_down | 113       | 22           | 7.32E-07 | 3.270      | 2.045          |
| OCT2Up-1   | 591      | HBL1.and.TMD8.GE.plus.peak_down | 113       | 12           | 0.00016  | 3.510      | 1.918          |

**Table S2** DLBCL related signatures (10) were also analyzed under the same modulation criteria and by crossing with modulated genes that also had ChIP-seq peaks (bottom). Red text are signatures repressed by FOXP1 that went up upon loss, and Green text are activated signatures in which their encompassed genes went down upon FOXP1 loss. Signature size includes all of the genes in the signature, list size includes the total number of affected genes, and intersection are the number of affected genes that both qualify and are in the signature gene list. Standard statistical analysis was used for calculating p values, signature enrichment, and confidence intervals.



| Signature   | Signature size | Genelist and DLBCL Correlation | Genelist size | Intersection | p value   | Enrichment | Conf Interval |
|-------------|----------------|--------------------------------|---------------|--------------|-----------|------------|---------------|
| BCL6-5      | 1174           | Genelist 1 vs. ABC             | 63            | 11           | 4.33E-06  | 5.4922663  | 2.85840814    |
| BCL6-6      | 4445           | Genelist 1 vs. ABC             | 63            | 24           | 1.10E-07  | 3.16494724 | 1.901567968   |
| CLLmut-1    | 17             | Genelist 1 vs. ABC             | 63            | 2            | 0.0003832 | 68.961718  | 15.43936022   |
| MycCHIP-2   | 3084           | Genelist 1 vs. ABC             | 63            | 17           | 1.09E-05  | 3.23118296 | 1.850237814   |
| BCL6-4      | 2786           | Genelist 1 vs. GCB             | 86            | 23           | 6.23E-08  | 3.54499658 | 2.195647848   |
| BCL6-6      | 4445           | Genelist 1 vs. GCB             | 86            | 37           | 5.70E-13  | 3.57436629 | 2.32974133    |
| MycCHIP-2   | 3084           | Genelist 1 vs. GCB             | 86            | 24           | 9.03E-08  | 3.34168854 | 2.083055683   |
| Prolif-6    | 3              | Genelist 1 vs. GCB             | 86            | 1            | 0.0069703 | 143.135659 | 12.8574088    |
| BAnergyUp-1 | 17             | Genelist 2 vs. ABC             | 31            | 2            | 9.20E-05  | 140.148008 | 30.66217215   |
| BCL6-6      | 4445           | Genelist 2 vs. ABC             | 31            | 14           | 4.68E-06  | 3.7519939  | 1.848235443   |
| PitLung-1   | 6              | Genelist 2 vs. ABC             | 31            | 1            | 0.0050265 | 198.543011 | 22.51841047   |
| BCL6-6      | 4445           | Genelist 2 vs. GCB             | 48            | 26           | 2.16E-12  | 4.50015936 | 2.548426213   |
| MycCHIP-2   | 3084           | Genelist 2 vs. GCB             | 48            | 13           | 0.0001111 | 3.24306231 | 1.714038931   |
| FDC-1       | 3              | Genelist 3 vs. ABC             | 106           | 1            | 0.0085867 | 116.128931 | 10.45013722   |
| MycCHIP-2   | 3084           | Genelist 3 vs. ABC             | 106           | 19           | 0.0012726 | 2.14635183 | 1.30482771    |
| BCL6-4      | 2786           | Genelist 3 vs. GCB             | 61            | 13           | 0.0005286 | 2.82487967 | 1.528737129   |
| MycCHIP-2   | 3084           | Genelist 3 vs. GCB             | 61            | 17           | 6.76E-06  | 3.33712339 | 1.904427015   |
| BCL6-5      | 1174           | Genelist..4.DN.vs.ABC          | 119           | 17           | 2.38E-07  | 4.49367243 | 2.680207597   |
| BCL6-6      | 4445           | Genelist..4.DN.vs.ABC          | 119           | 33           | 3.05E-06  | 2.30389542 | 1.540378394   |
| Heme-2      | 17             | Genelist..4.DN.vs.ABC          | 119           | 2            | 1.36E-03  | 36.5091448 | 8.256784774   |
| JAK2Up-1    | 952            | Genelist..4.DN.vs.ABC          | 119           | 26           | 4.34E-17  | 8.47533719 | 5.460226096   |
| JAKUp-2     | 325            | Genelist..4.DN.vs.ABC          | 119           | 11           | 9.39E-09  | 10.5034001 | 5.592995937   |
| MYD88Up-1   | 273            | Genelist..4.DN.vs.ABC          | 119           | 15           | 1.52E-14  | 17.0509742 | 9.788457563   |
| NFkB-10     | 208            | Genelist..4.DN.vs.ABC          | 119           | 11           | 8.60E-11  | 16.4115627 | 8.689050982   |
| NFkB-2      | 39             | Genelist..4.DN.vs.ABC          | 119           | 4            | 7.73E-06  | 31.8284852 | 11.13200299   |
| BCL6-4      | 2786           | Genelist..4.DN.vs.GCB          | 67            | 18           | 1.54E-06  | 3.56109974 | 2.071942485   |
| BCL6-6      | 4445           | Genelist..4.DN.vs.GCB          | 67            | 27           | 4.29E-09  | 3.34799456 | 2.052744943   |
| JAK2Up-1    | 952            | Genelist..4.DN.vs.GCB          | 67            | 21           | 1.48E-17  | 12.1583626 | 7.226522857   |
| MYD88Up-1   | 273            | Genelist..4.DN.vs.GCB          | 67            | 14           | 7.18E-17  | 28.2655951 | 15.48917366   |
| BCL6-4      | 2786           | Genelist..4.UP.Unique.vs.ABC   | 60            | 20           | 7.33E-09  | 4.41840153 | 2.579570537   |
| BCL6-5      | 1174           | Genelist..4.UP.Unique.vs.ABC   | 60            | 15           | 4.37E-10  | 7.86392675 | 4.371109776   |
| BCL6-6      | 4445           | Genelist..4.UP.Unique.vs.ABC   | 60            | 28           | 3.43E-11  | 3.87706037 | 2.332440698   |
| BCL6-4      | 2786           | Genelist..4.UP.vs.GCB          | 104           | 23           | 2.40E-06  | 2.93143948 | 1.84188782    |
| BCL6-5      | 1174           | Genelist..4.UP.vs.GCB          | 104           | 11           | 0.000481  | 3.32704593 | 1.776132332   |
| BCL6-6      | 4445           | Genelist..4.UP.vs.GCB          | 104           | 48           | 6.55E-18  | 3.83445531 | 2.604445948   |
| CLLmut-1    | 17             | Genelist..4.UP.vs.GCB          | 104           | 2            | 1.04E-03  | 41.7748869 | 9.432344689   |
| GCBDLBCL-3  | 284            | Genelist..4.UP.vs.GCB          | 104           | 10           | 8.53E-09  | 12.5030471 | 6.444956518   |
| JAK2Dn-1    | 409            | Genelist..4.UP.vs.GCB          | 104           | 13           | 1.54E-10  | 11.2863692 | 6.259436729   |
| MycCHIP-2   | 3084           | Genelist..4.UP.vs.GCB          | 104           | 19           | 0.0010425 | 2.18762783 | 1.328534646   |
| MYD88Dn-1   | 283            | Genelist..4.UP.vs.GCB          | 104           | 11           | 5.23E-10  | 13.8019503 | 7.305330197   |
| BCL6-6      | 4445           | Genelist..5.DN.v.ABC           | 25            | 10           | 0.00037   | 3.3231946  | 1.492062896   |
| BCL6-4      | 2786           | Genelist..5.UP.vs.GCB          | 32            | 13           | 2.21E-07  | 5.38492687 | 2.656685542   |
| BCL6-5      | 1174           | Genelist..5.UP.vs.GCB          | 32            | 10           | 3.46E-08  | 9.82990843 | 4.644356082   |
| BCL6-6      | 4445           | Genelist..5.UP.vs.GCB          | 32            | 19           | 2.37E-10  | 4.93286699 | 2.434540706   |

**Table S4:** Significant signatures (10, 51) from indicated enriched FOXP1 target GSEA gene lists (Fig 7B).



**Table S5:** GO and KEGG Terms (27) of GSEA enriched FOXP1 target genes from combined genelists (Fig 7B)

## GSEA listed GO terms

| Category      | Term                                                      | Count | %         | PValue   |
|---------------|-----------------------------------------------------------|-------|-----------|----------|
| GOTERM_BP_FAT | GO:0016265~death                                          | 52    | 7.1922545 | 9.76E-05 |
| GOTERM_BP_FAT | GO:0008219~cell death                                     | 50    | 6.9156293 | 2.94E-04 |
| GOTERM_BP_FAT | GO:0008284~positive regulation of cell proliferation      | 31    | 4.2876902 | 0.00173  |
| GOTERM_BP_FAT | GO:0042127~regulation of cell proliferation               | 49    | 6.7773167 | 0.00346  |
| GOTERM_BP_FAT | GO:0012501~programmed cell death                          | 40    | 5.5325035 | 0.0039   |
| GOTERM_BP_FAT | GO:0006915~apoptosis                                      | 39    | 5.3941909 | 0.0052   |
| GOTERM_BP_FAT | GO:0008629~induction of apoptosis by intracellular signal | 8     | 1.1065007 | 0.00614  |
| GOTERM_BP_FAT | GO:0070227~lymphocyte apoptosis                           | 4     | 0.5532503 | 0.00657  |
| GOTERM_BP_FAT | GO:0070265~necrotic cell death                            | 3     | 0.4149378 | 0.01536  |
| GOTERM_BP_FAT | GO:0043068~positive regulation of programmed cell death   | 28    | 3.8727524 | 0.01935  |
| GOTERM_BP_FAT | GO:0010942~positive regulation of cell death              | 28    | 3.8727524 | 0.02037  |
| GOTERM_BP_FAT | GO:0008283~cell proliferation                             | 27    | 3.7344398 | 0.034    |
| GOTERM_BP_FAT | GO:0046649~lymphocyte activation                          | 15    | 2.0746888 | 0.03403  |
| GOTERM_BP_FAT | GO:0016477~cell migration                                 | 19    | 2.6279391 | 0.03437  |
| GOTERM_BP_FAT | GO:0002902~regulation of B cell apoptosis                 | 3     | 0.4149378 | 0.03965  |
| GOTERM_BP_FAT | GO:0045321~leukocyte activation                           | 17    | 2.351314  | 0.03992  |
| GOTERM_BP_FAT | GO:0012502~induction of programmed cell death             | 21    | 2.9045643 | 0.04023  |
| GOTERM_BP_FAT | GO:0001775~cell activation                                | 19    | 2.6279391 | 0.0473   |
| GOTERM_BP_FAT | GO:0043067~regulation of programmed cell death            | 44    | 6.0857538 | 0.04781  |
| KEGG_PATHWAY  | hsa05200:Pathways in cancer                               | 24    | 3.3195021 | 0.01608  |
| KEGG_PATHWAY  | hsa04662:B cell receptor signaling pathway                | 9     | 1.2448133 | 0.01618  |
| KEGG_PATHWAY  | hsa04115:p53 signaling pathway                            | 8     | 1.1065007 | 0.02837  |
| KEGG_PATHWAY  | hsa04310:Wnt signaling pathway                            | 13    | 1.7980636 | 0.0324   |

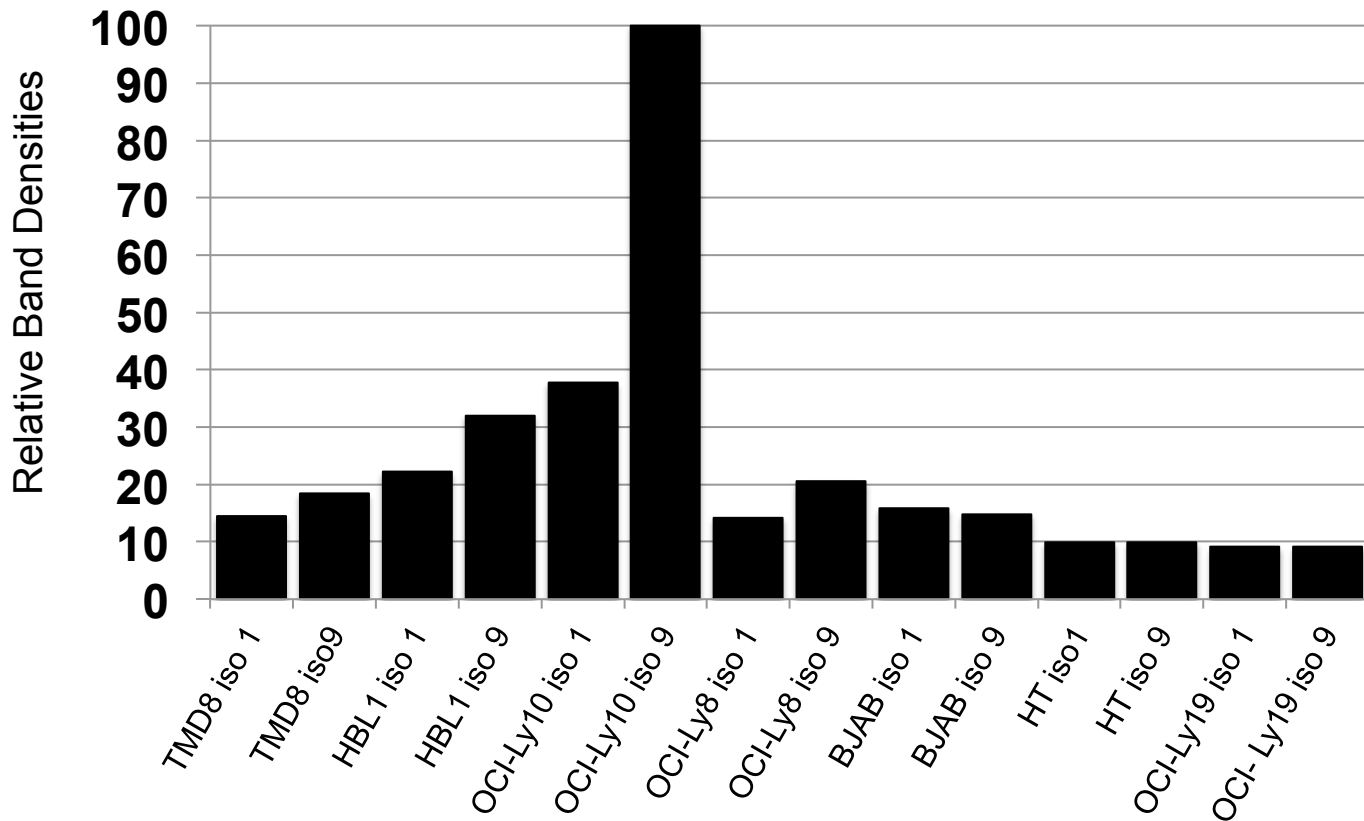

**Figure S1.** Band densities from western blot of FOXP1 in all lines tested days of elevated FOXP1 protein level in ABC lines compared to GCB lines. Bar graphs are normalized to GAPDH. The quantitative analyses confirms that the GCB-line OCI-Ly8 shows similar FOXP1 expression to an ABC line (TMD8), and exhibits an ABC-DLBCL like ratio of isoform 9 to isoform 1 expression. Our FOXP1 ChIP-seq binding analysis, however, identified FOXP1 direct targets for OCI-Ly8 as intermediate between ABC and GCB, but somewhat closer to GCB-DLBCL. This indicates that not only FOXP1 expression but also its functional promoter/enhancer binding to control gene expression plays an important role in potential diagnosis (analyzed in Fig. 7). This trend is also observed in additional GCB lines (eg, OCI-Ly1 and Karpas\_422) which express FOXP1 at higher levels (Figure 3A).

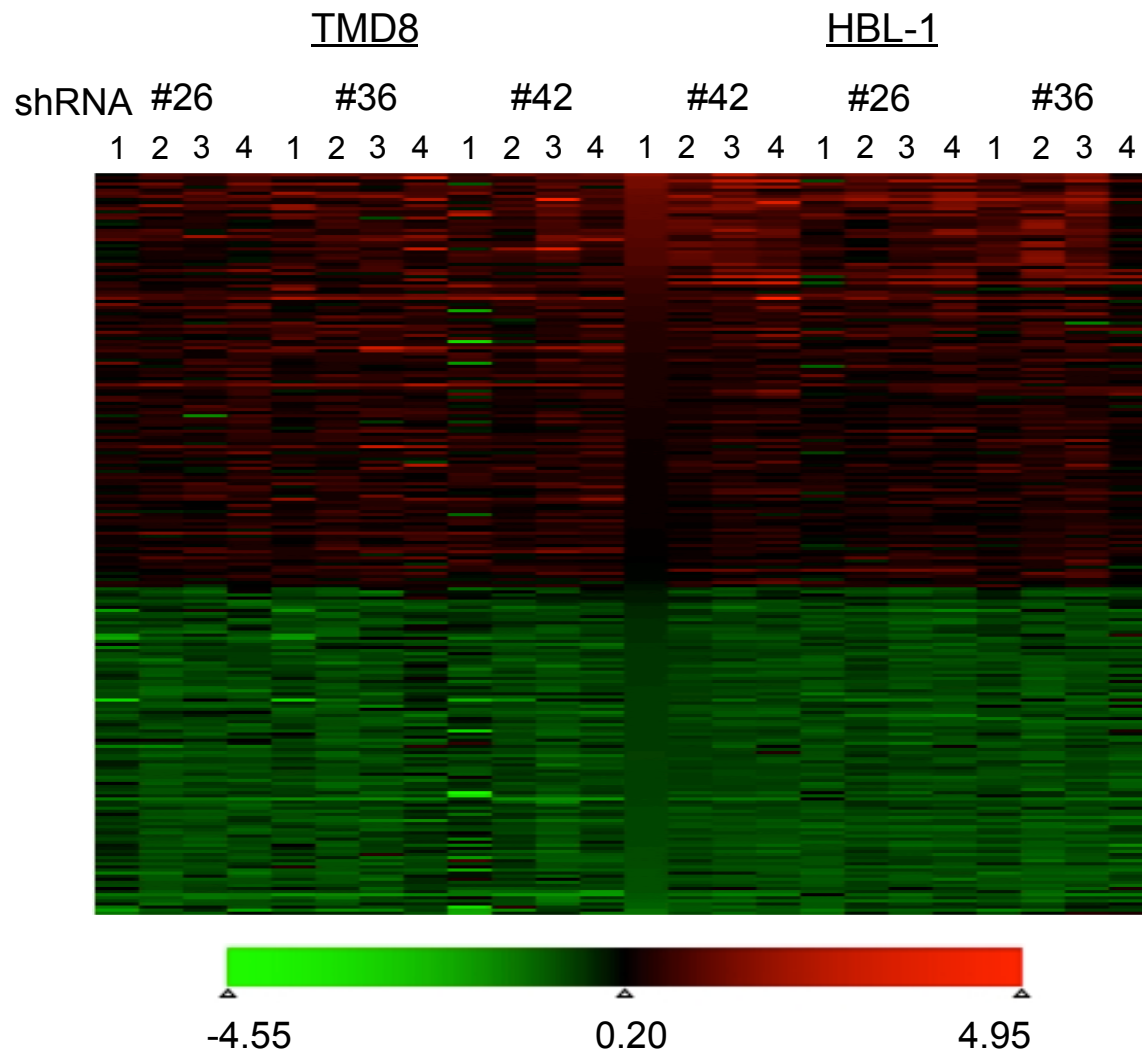

**Figure S2.** ABC-DLBCL lines TMD8 and HBL-1 were each transformed with pRSMX vector containing one of three different FOXP1 targeted shRNAs. After doxycycline induction, RNA was collected at multiple timepoints as indicated for Agilent microarray analysis. The representative heat map indicates strong correlation both between cell lines and modulation of targets compared to scrambled shRNA controls.

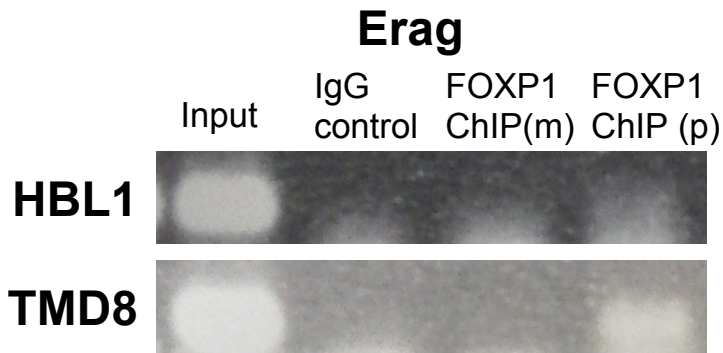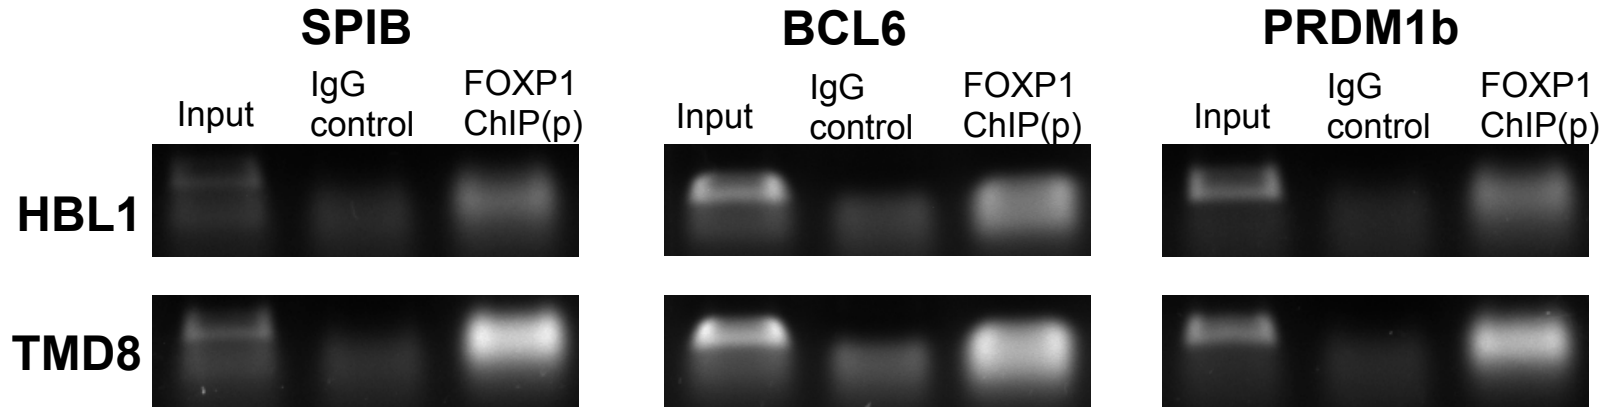

**Figure S3:** Endpoint RT-qPCR confirmation of FOXP1 targets established by ChIP-seq. Top: Establishing endpoint ChIP-PCR conditions. Specificity of initial ChIP conditions with monoclonal or polyclonal FOXP1 antibodies were confirmed by employing a previously determined FOXP1 binding site, the enhancer of RAG (Erag) (54). Polyclonal anti-FOXP1 proved superior, and we proceeded with these conditions.

Bottom: Endpoint ChIP-PCR of FOXP1-bound target genes identified in our ChIP-seq dataset.

Primers designed for spanning peaks were:

SPIB F: AGGTGCTGACCTGTTTCCTCC, R: GGATAGAGATGGGAGTCGCTG;

BCL6 F: CTGGTGTCCGGCCTTTCCTA, R: GCAGTAAAAATCTCGGAGAGCTG;

PRDM1b F: CCGCCTGTGTAAAGGGACA, R: AAGGCACTGTTCTAGCAGG

ERP29 TRIM65 DUSP1 ARFGAP2  
TPRA1 EML3 RPS6KB2 JMJD8  
NOC2L UBE2J2 COMTD1 OGDH  
COASY CCDC86 NACC1 C7orf50  
TRMT2A SLC1A5 OAZ1 CTU1  
GIT1 PQLC1 UBE2S NCAPH2  
RANGAP1 SMPD4 POLD1 TRIM28  
SNRNP70 SAMD4B GLTSCR1

DDAH1 CD80 NEDD9 NCOA1  
FMNL3 NEDD4L ARIH2 FOXP1  
GBA2 PPIA3 CABLES1 CPT1A  
TLE3 TNS3 SYK KIF16B CALML6  
OSR2 TMEM52 RGS1 RCAN2  
SERP1 CUEDC2 MKNK2

GAS5 PARP8 IKZF2 ZCCHC7  
TIFA PRRT2 TRIM41 SNX29  
LOC147727 HIST1H1B LPP  
FMO4 RRAGA BAG1 EMP3  
CPEB3 BPTF USP6NL ZBTB20  
ERP44 STIM2 CBLB ELOVL6  
CNOT2 KLHL5 SLC25A11 CD69  
TRIM22 TRANK1 RASSF6  
TXLNB PLEKHH3 VPS13B  
RALGPS2 PELI1 NCOA3  
RALGPS1 FCRL4 KLF6 P2RX5  
MTPN

ATP11A DGKZ C9orf139 AKT1S1  
SBNO2 TBC1D17 TMC1 KLHL17  
MFAP5 PLAC8 PRICKLE1  
MTMR14 TLE4 ANXA6 ECE1  
AHNAK ABCA7 DNASE1L3  
ADAP1 IL4I1 PTPN1 BZRAP1  
DUSP5P SLC12A7 CLCN5  
BHLHE40 CCR7 NR4A2 PARVB  
TTC28 LIMD1 GAB1 CASK  
SH3PXD2A TNFRSF13B ARID5B  
PRDM1 DMD RBM47 COL9A3  
TOX2 CEP68 TP53I11 BANK1  
FAM43A KMO JAZF1

RAP1GAP2 SCD SH3KBP1 GPER  
LRRC32 DERL3 SEC14L1 FUZ  
SIPA1L3 LIMK1 KIAA0226  
AKAP13 CD22 PTK2 COTL1  
POU2F2 SLC46A3 CD19 ST6GAL1  
ZNF608 TIAM1 ZNF395

ZNF238 CSNK1G3 PPP1R12B  
PJA2 USP3 FCHO2 PDE4DIP  
VPS13D DHTKD1 DHTKD1  
MBNL1 MEF2C PIK3R1 CCDC6  
C3ORF26 NLN FILIP1L CKAP2  
HSPD1 MDM2 SEPSECS OXR1  
HIF1A NFE2L2 BACH1 FNDC3A  
RANBP2 ADAM10 NIPBL PHIP  
CHD9 LCOR C3ORF58 UBE2G1  
TRIM37 ZZZ3 PCMTD2 CCPG1  
NEK7 DDHD1 C15ORF29 CASC4  
PTEN OTUD1

ABI1 FADD PGK1 C15orf39  
DHRS13 TIGD6 GTF3C2 CNP

IL28RA DNAJB6 STK35 AGPAT6  
RNF122 SNRPD3 MCM7  
C14ORF93 SMARCB1 RBM38  
STX10 ATF4 GPT2 LARP1  
DEPDC5 MLLT6 SYNE2 RALGDS  
MAF1 MXI1

**Figure S4.** Genes listed in heatmap for Figure 3A (color code is on right side of heatmap). **RED** are genes that went DOWN after FOXP1 KD, and are directly upregulated by FOXP1 and **GREEN** are genes that went UP after FOXP1 KD and are directly repressed.

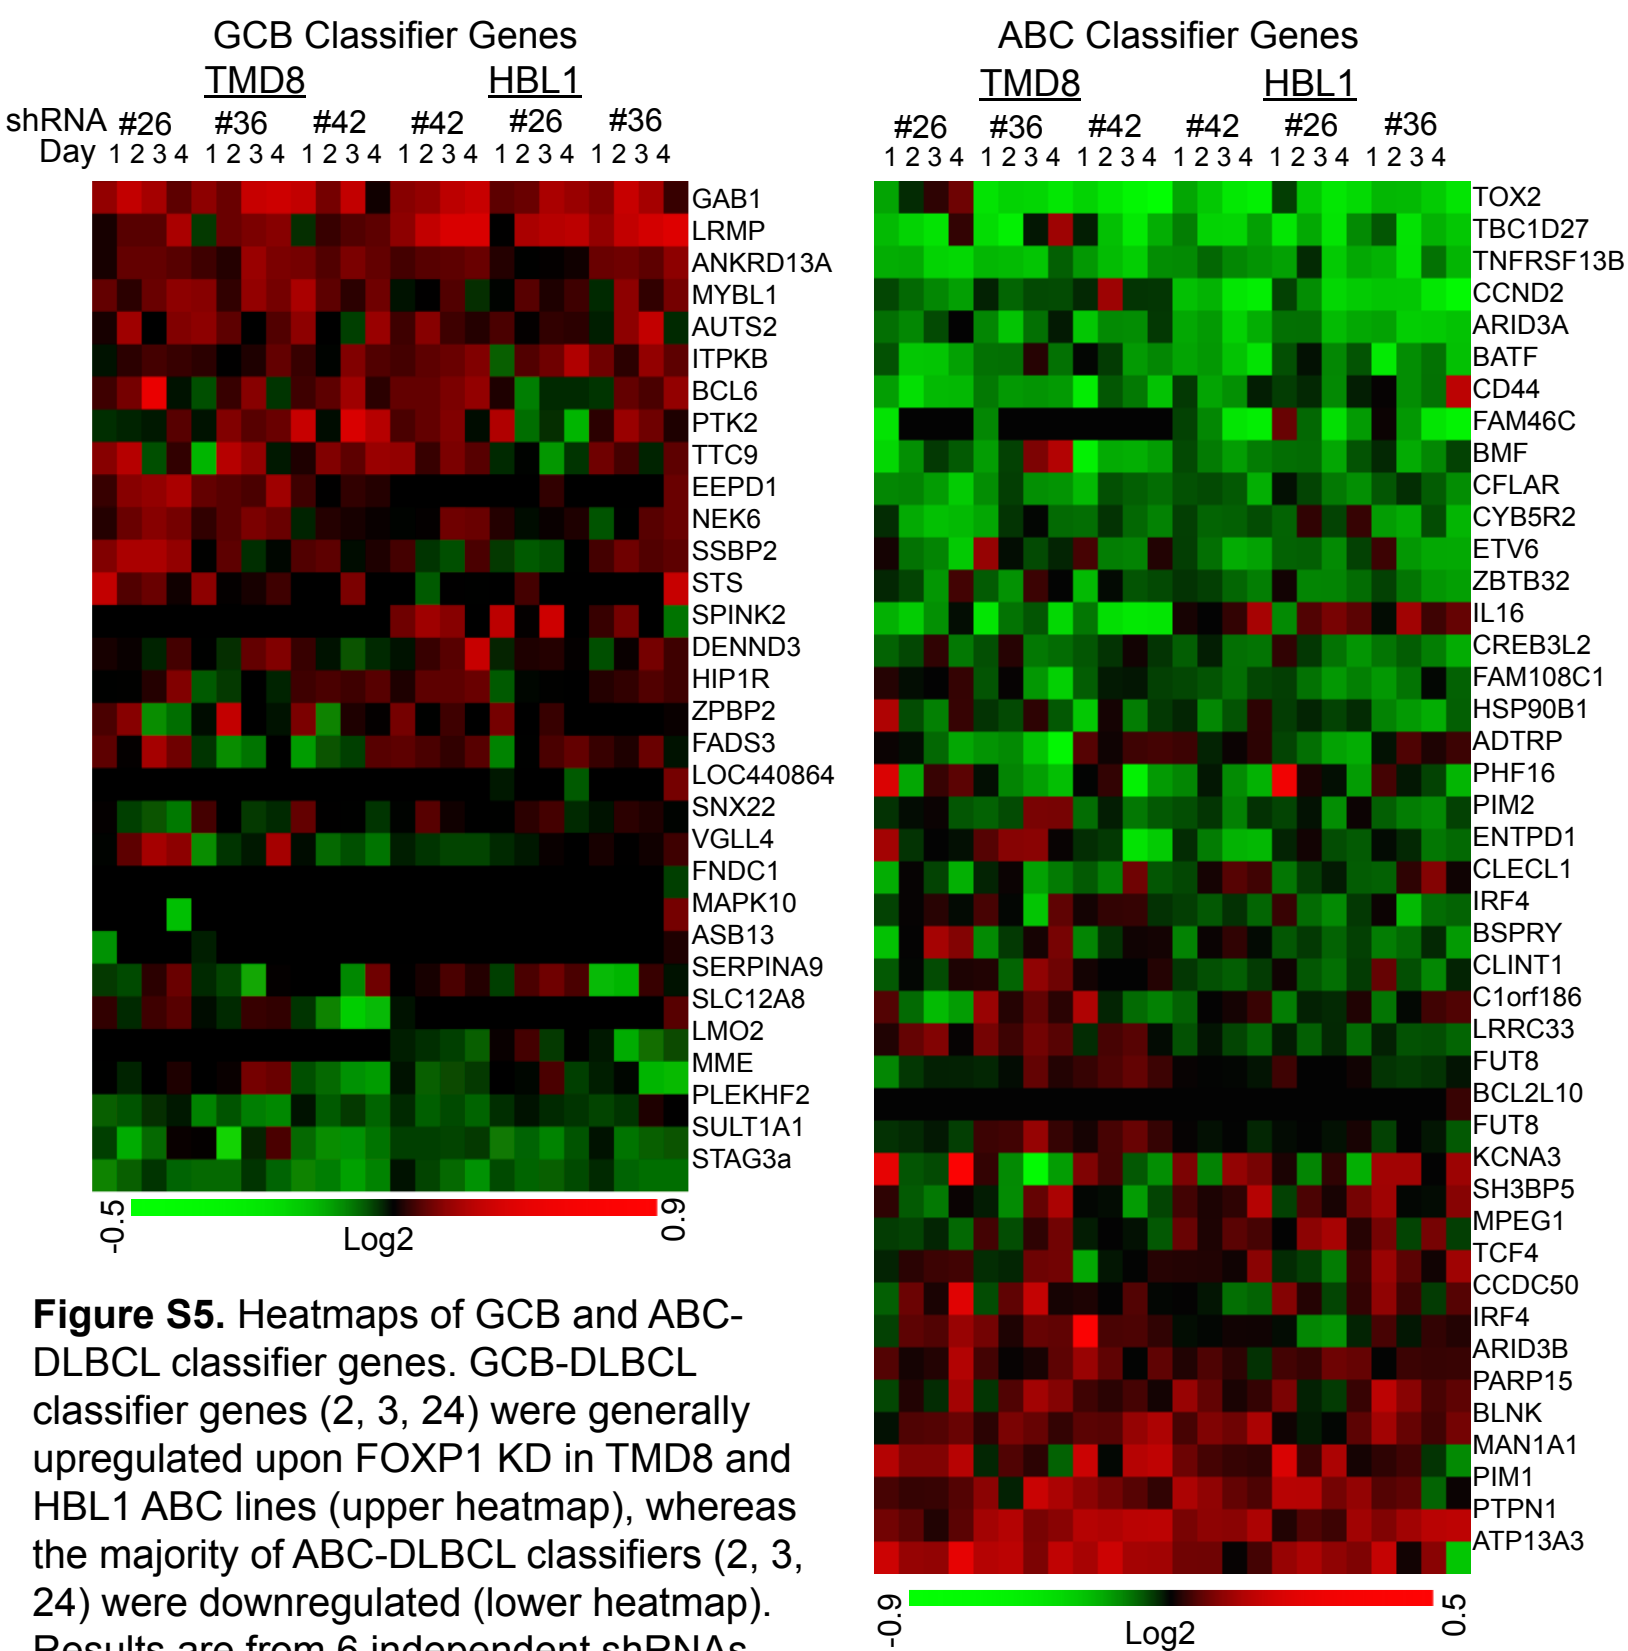

**Figure S5.** Heatmaps of GCB and ABC-DLBCL classifier genes. GCB-DLBCL classifier genes (2, 3, 24) were generally upregulated upon FOXP1 KD in TMD8 and HBL1 ABC lines (upper heatmap), whereas the majority of ABC-DLBCL classifiers (2, 3, 24) were downregulated (lower heatmap). Results are from 6 independent shRNAs (#'s indicated) following induction for indicated times (days).

## Gene Ontology Analysis

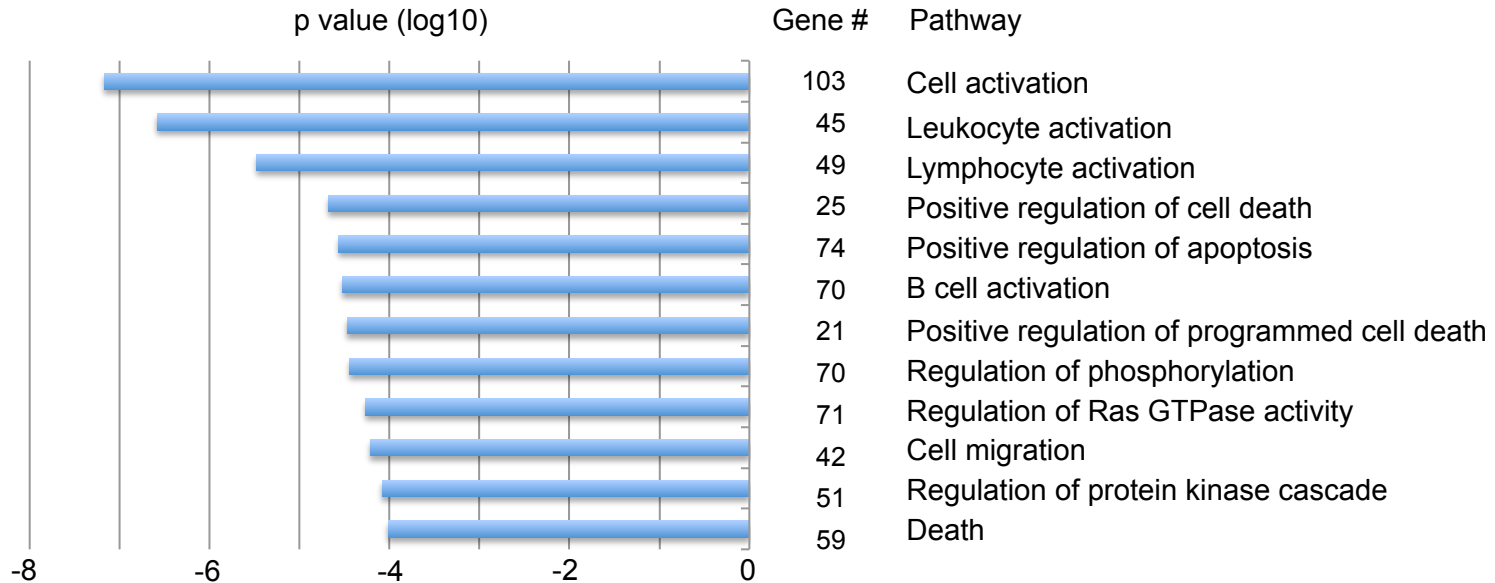

**Figure S6:** Genes qualified as modulated when 5/12 samples (See Fig S1 for the 12 samples and their timepoints) reached a  $\log_2 \pm 0.3$  value change for either the HBL1 or TMD8 cell lines after shRNA interference of FOXP1 expression. For Gene Ontology analysis, the top half of qualified activated and repressed genes were analyzed by DAVID analysis (49,50) using GO\_TERM\_BP\_FAT functional annotation. Gene # are the number of modulated genes intersecting with the indicated pathway.

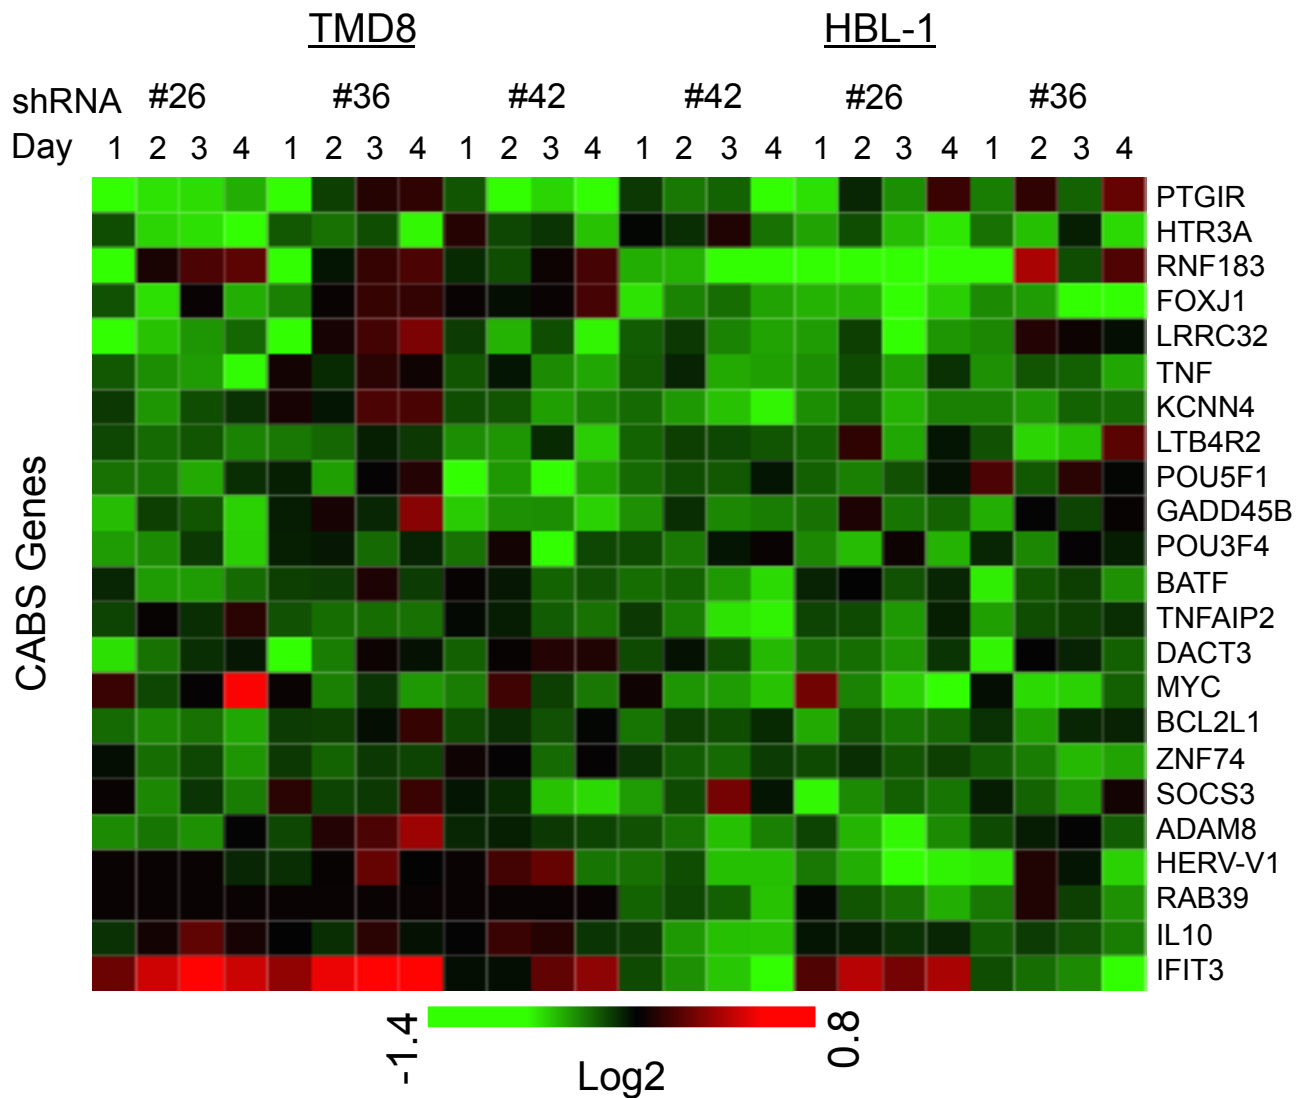

**Figure S7.** Heatmap of modulated genes from a hallmark of ABC-DLBCL, chronic activation of BCR signaling (8), are nearly all upregulated by FOXP1.



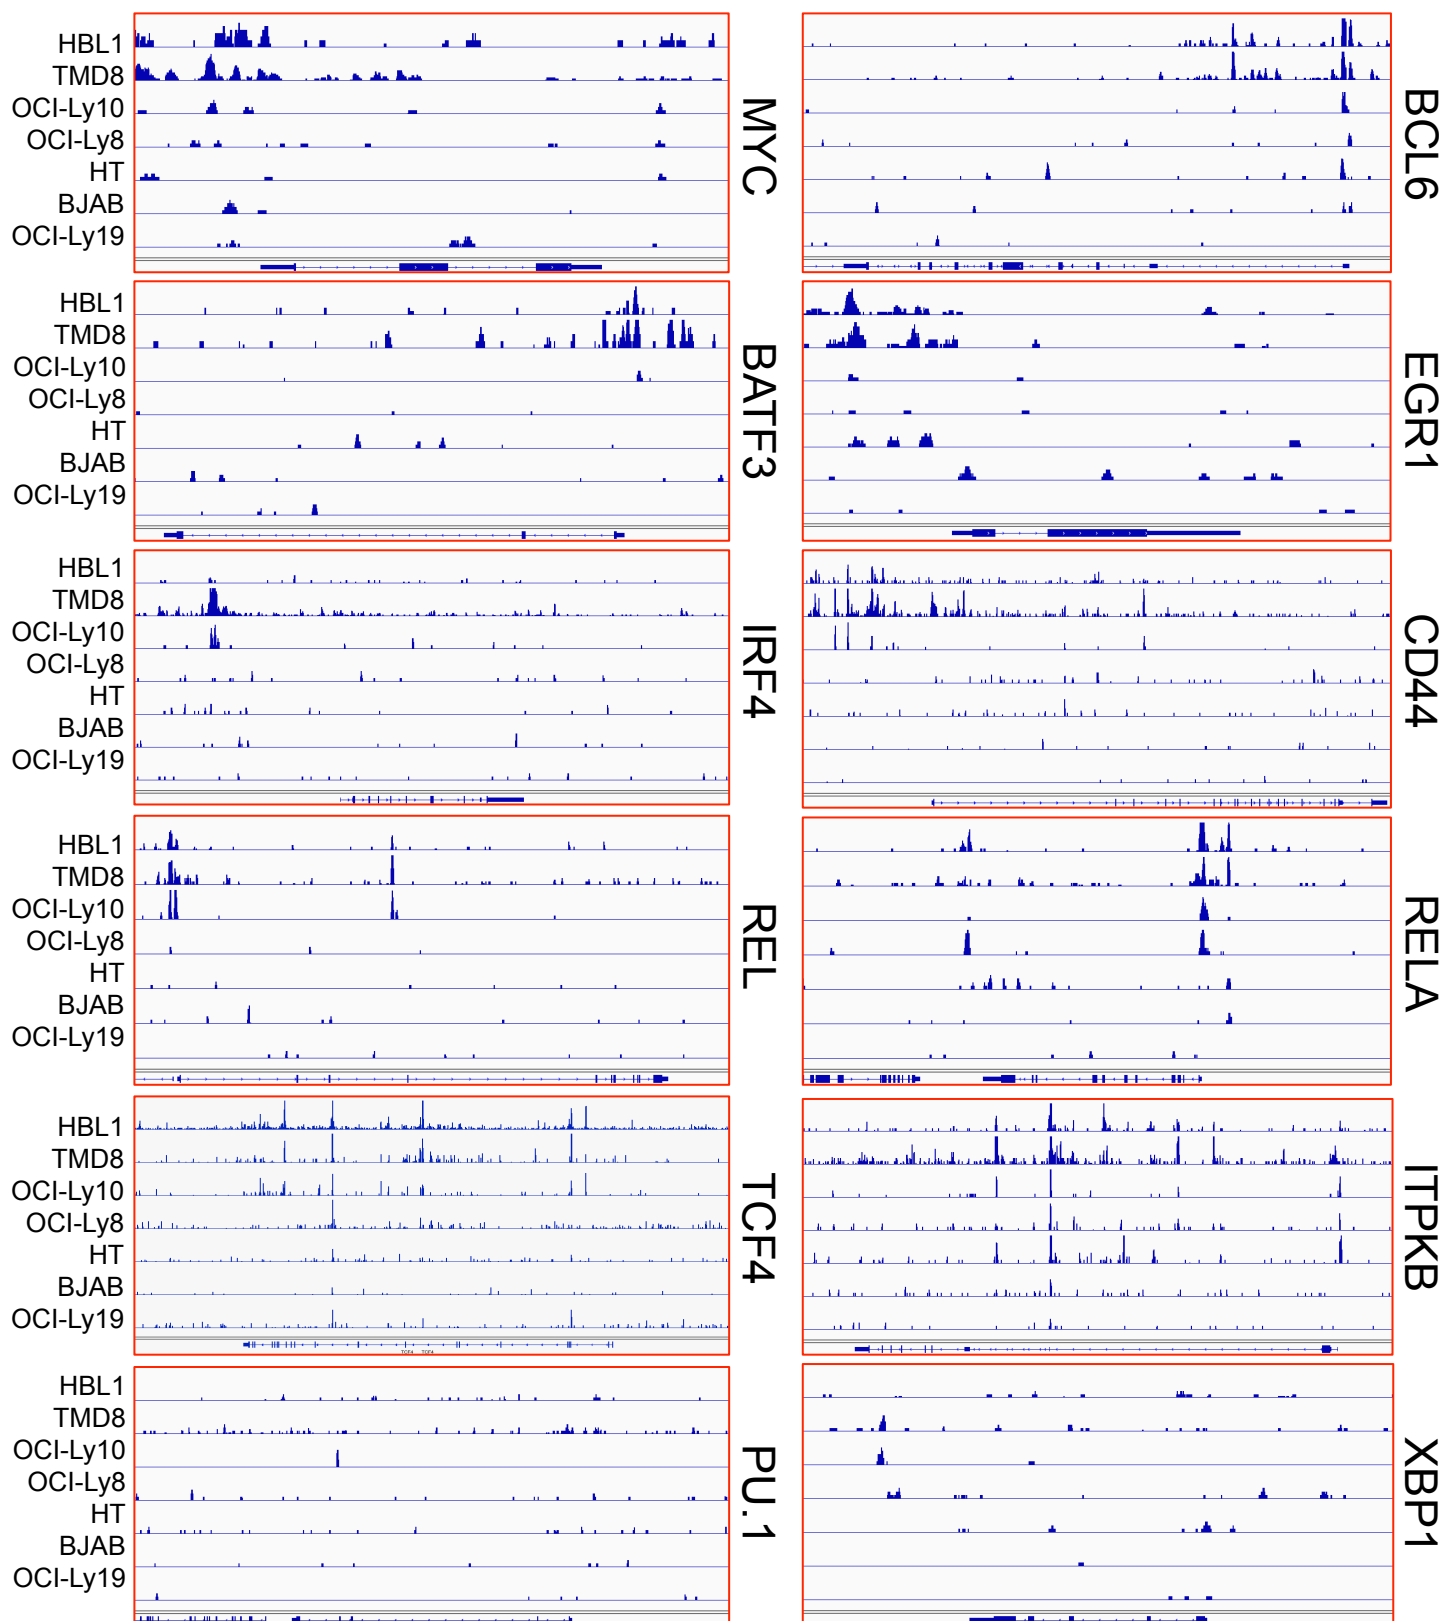

**Figure S8.** Examples of peak mapping along the loci of select genes relevant to B cell identity (BCL6), cell survival/proliferation (MYC, EGR1), NF- $\kappa$ B (REL, RELA) plasmacytic differentiation (IRF4, BATF3) and ABC (CD44, TCF4, MYC) or GCB-DLBCL (ITPKB). ChIP-seq peaks from seven DLBCL cell lines were determined and aligned. In general, many loci had aligned peaks across all seven lines while many had aligned peaks only in ABC-lines, indicating different binding patterns between the two DLBCL types. Still other relevant loci that were or were not modulated had no aligned peaks, as with PU.1 (not modulated) and XBP1 (activated by FOXP1, Fig.4A,6A).

# FOXP1 bound genes, this study

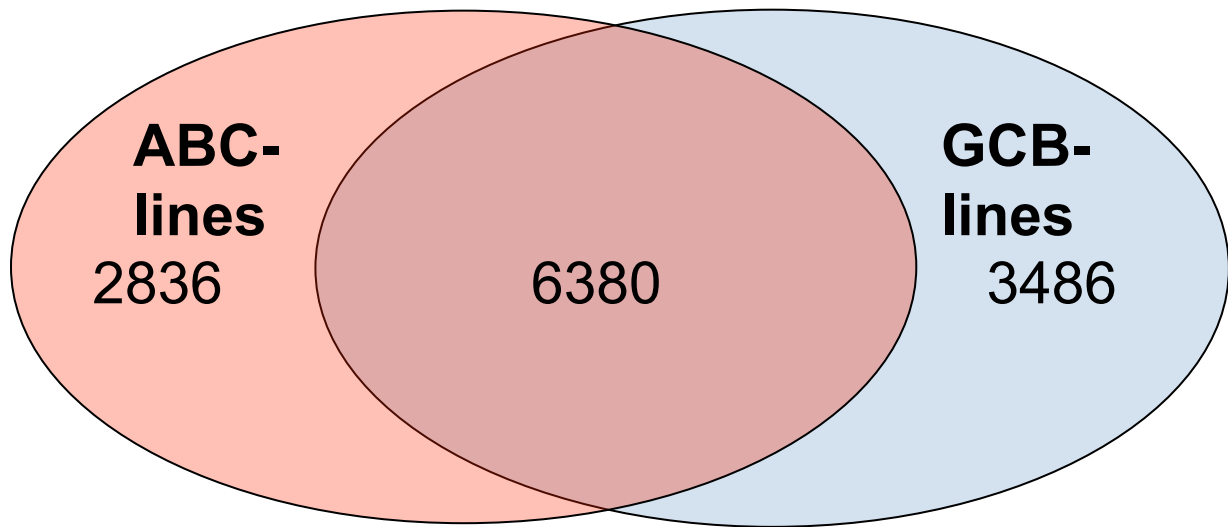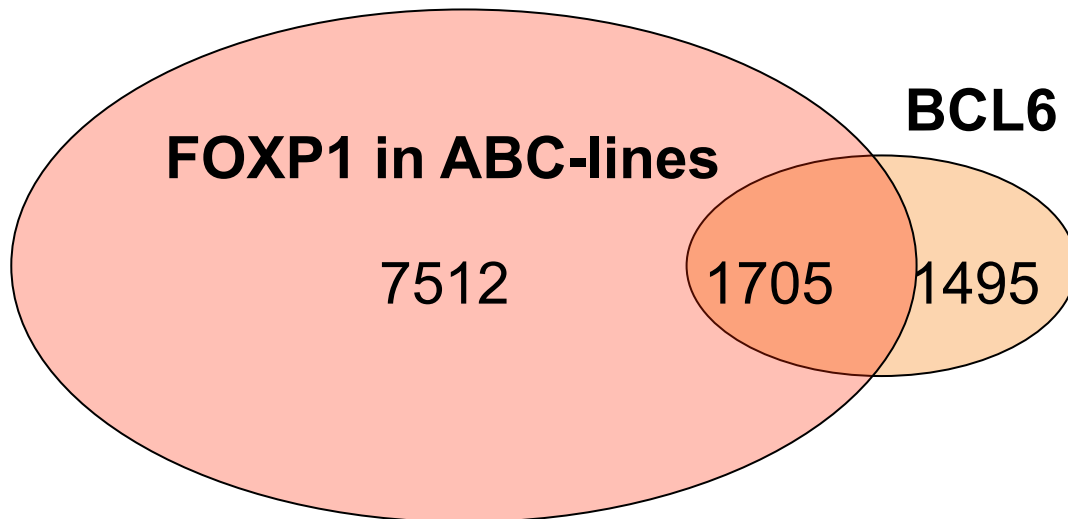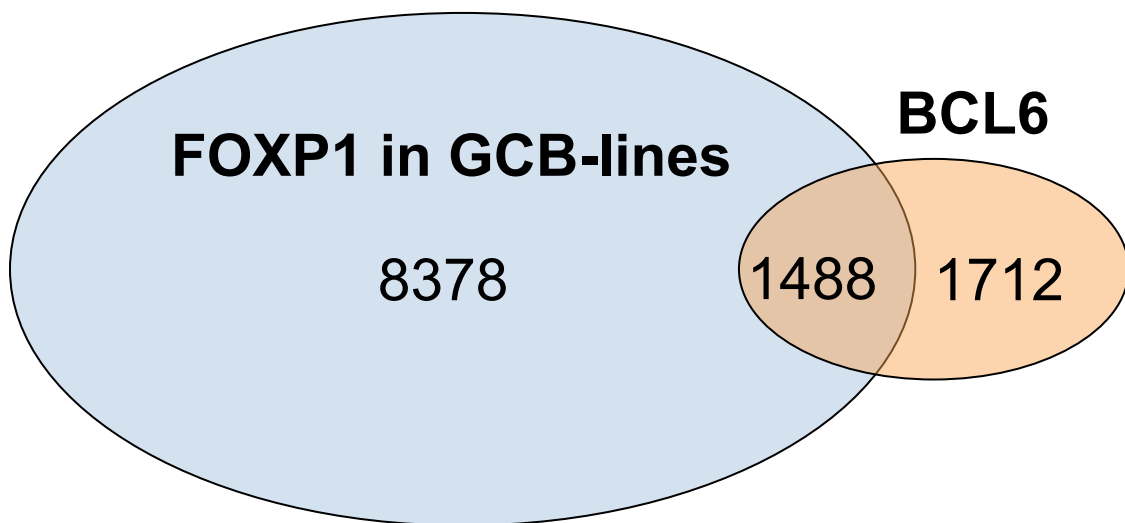

-  FOXP1 bound genes in ABC-lines
-  FOXP1 bound genes in GCB-lines
-  BCL6 bound genes Ci et. al.

**Figure S9:** Venn diagrams of: Top) FOXP1 gene targets shared by in ABC vs. GCB-lines, middle) BCL6 gene targets from Ci et. al. 2012 (31) shared by FOXP1 ABC-line gene targets, or (bottom) The same BCL6 gene targets shared by FOXP1 GCB-line gene targets. All FOXP1 gene targets were determined by GREAT analysis (35).

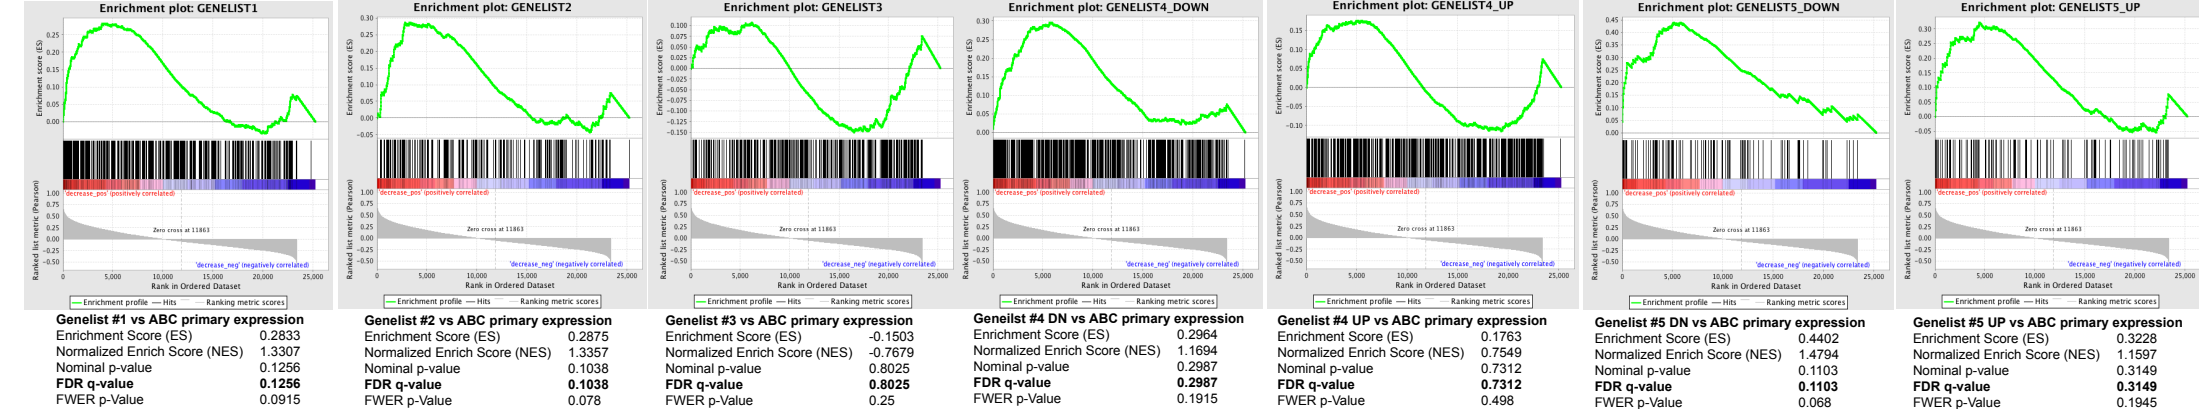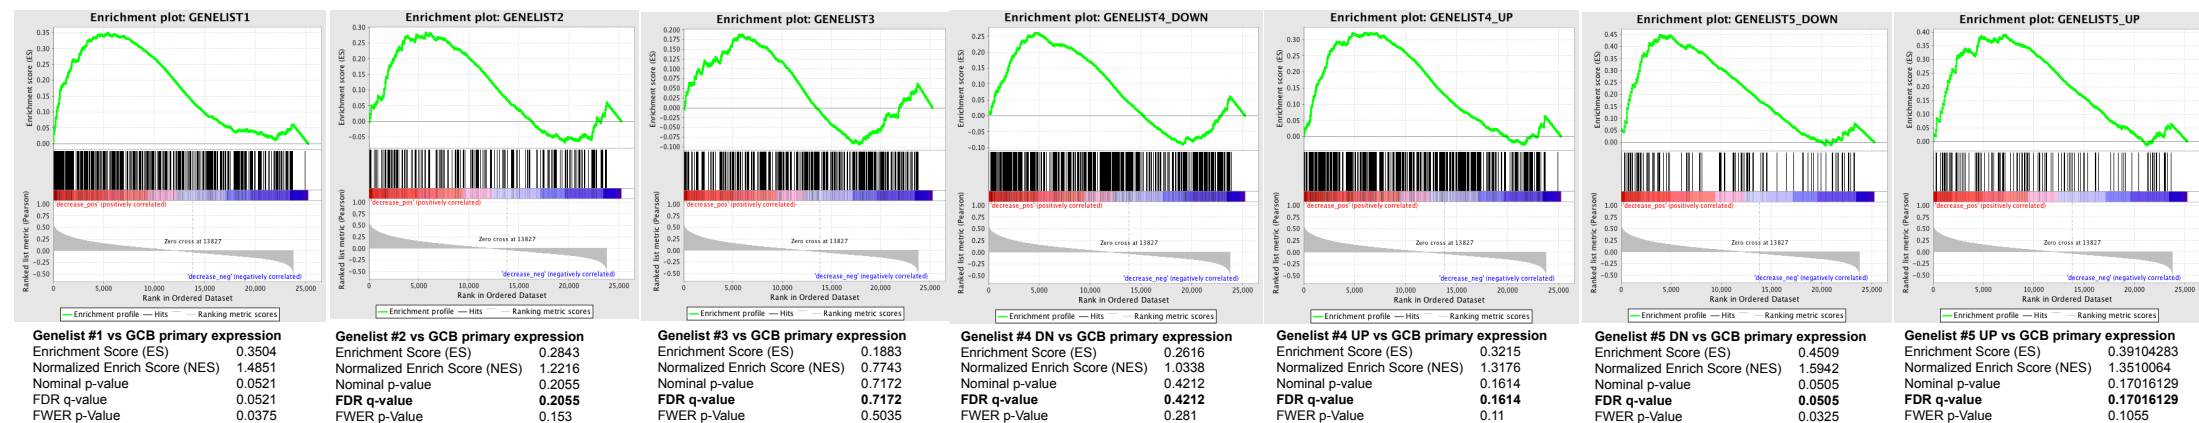

**Figure S10:** Gene Set Enrichment Analysis (GSEA) of defined genelists (Fig 7B, Table S3). Each list was correlated with FOXP1 gene expression in ABC or GCB primary RNA-seq data from the dbGenotypes and Phenotypes database (dbGaP; accession number: phs00235)

**Below:** Enriched Gene set #1 compared with ABC primary DLBCL expression

**Right:** Enriched Gene set #1 compared with GCB primary DLBCL expression

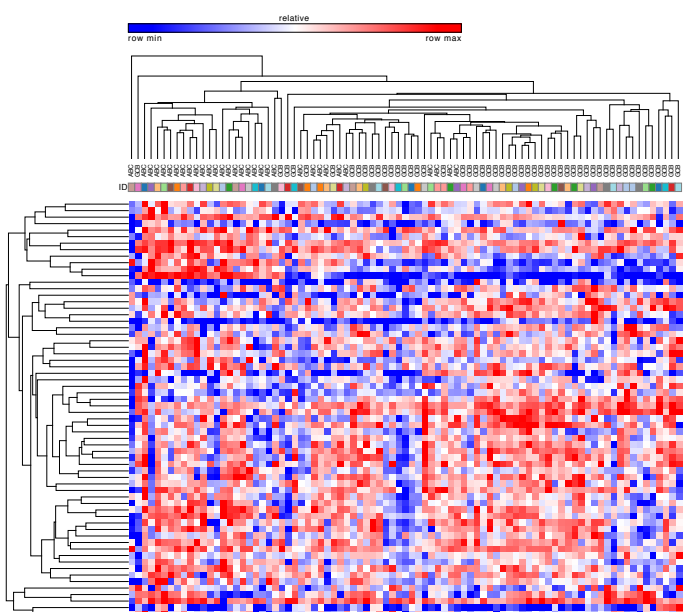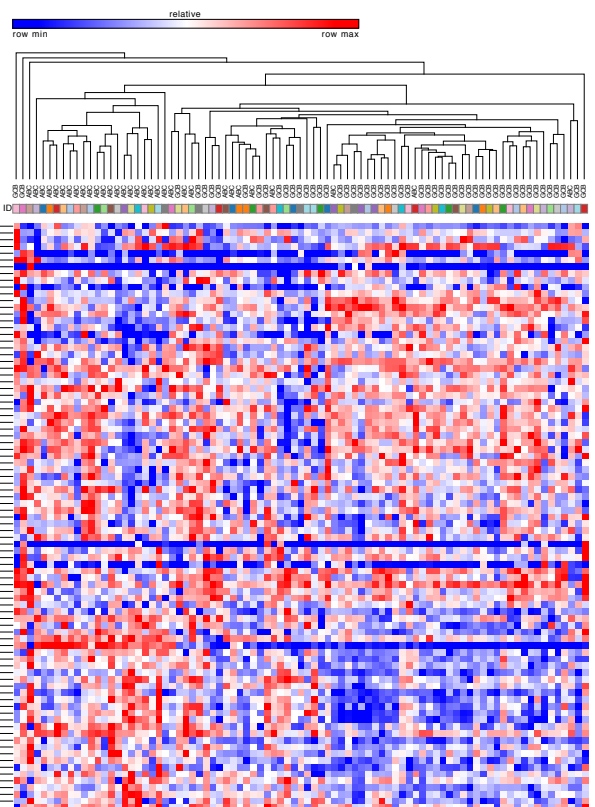

**Below:** Enriched Gene set #2 compared with ABC primary DLBCL expression

**Right:** Enriched Gene set #2 compared with GCB primary DLBCL expression

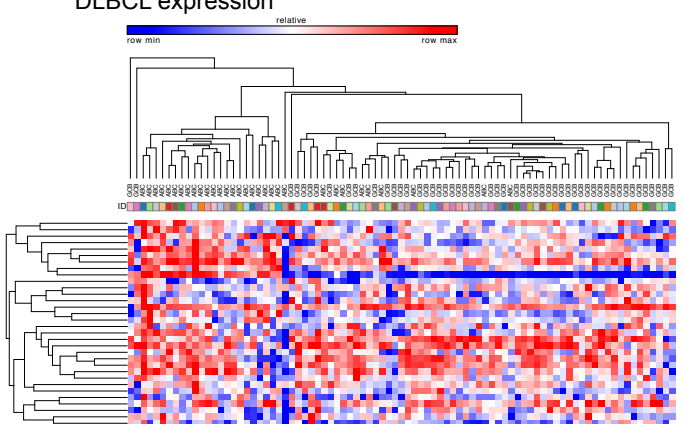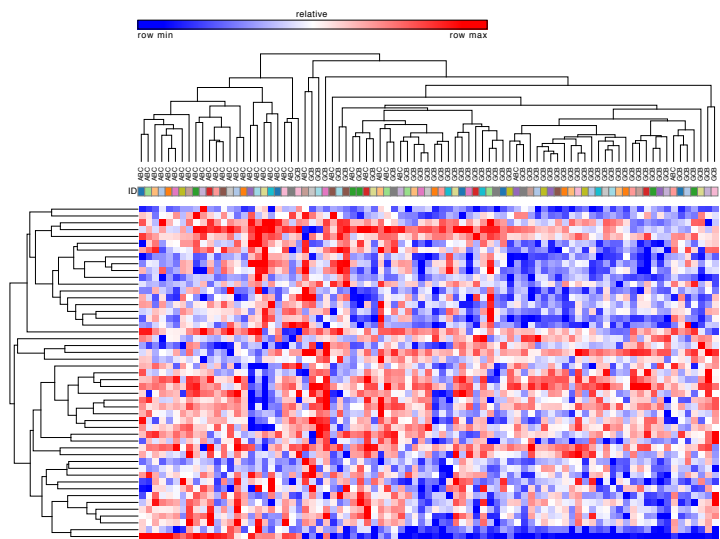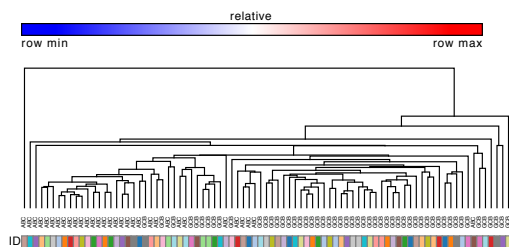

**Below:** Enriched Gene set #3 compared with GCB primary DLBCL expression

**Left:** Enriched Gene set #3 compared with ABC primary DLBCL expression

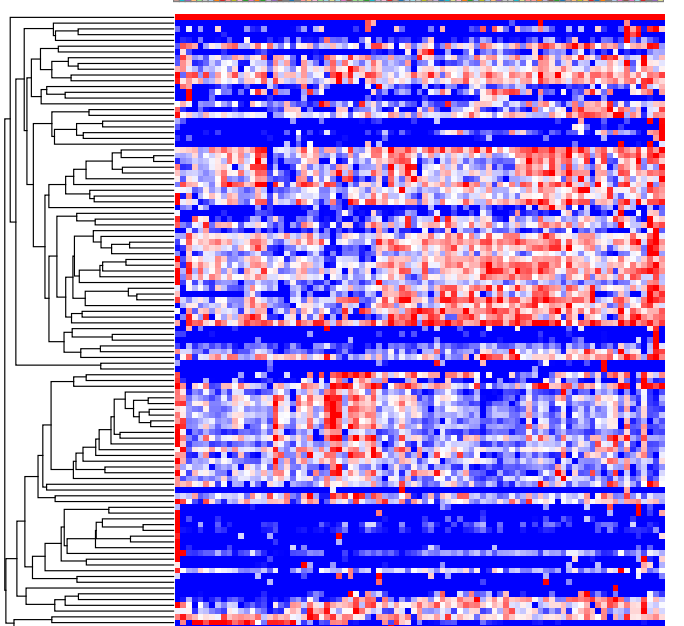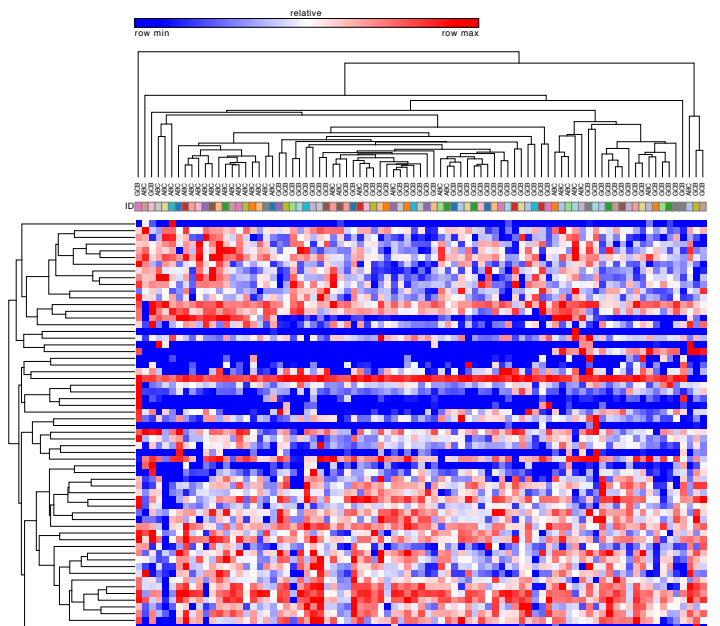

**Figure S11:** Primary DLBCL expression for each gene from GSEA derived gene lists (Fig. 7B) were compared to ABC or GCB primary expression (dbGaP: accession number: phs000235) and then hierarchically clustered by expression to determine the ability of each FOXP1 target gene set to segregate ABC from GCB subtypes. Genes were also hierarchically clustered along the x axis. Gene lists are zoomable or available in Table S3.

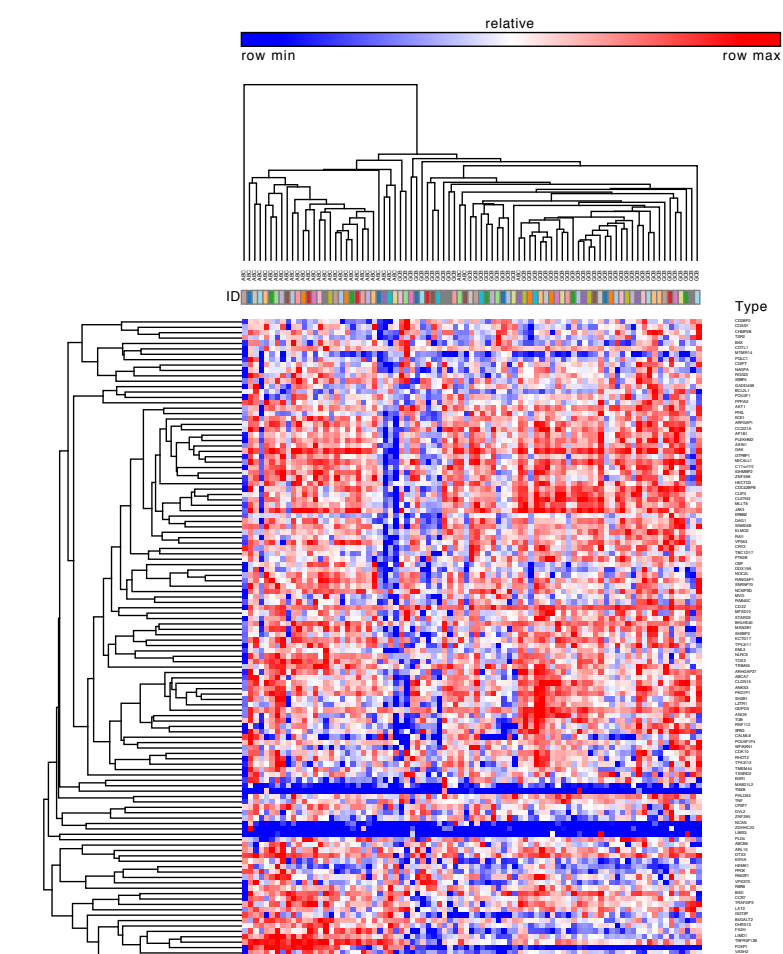

**Below:** Enriched Gene set #4 Downregulated genes compared with GCB primary DLBCL expression  
**Left:** Enriched Gene set #4 Downregulated genes compared with ABC primary DLBCL expression

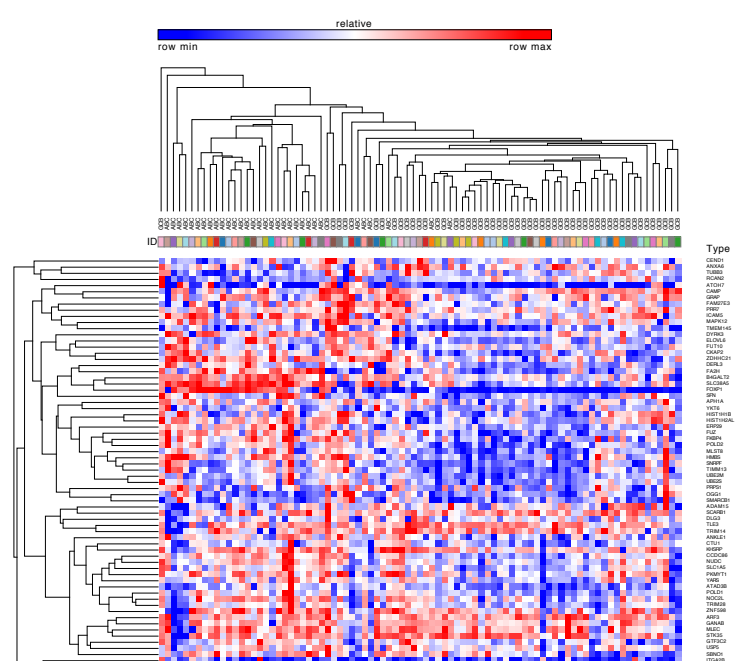

**Below:** Enriched Gene set #4 Upregulated genes compared with ABC primary DLBCL expression  
**Right:** Enriched Gene set #4 Upregulated genes compared with GCB primary DLBCL expression

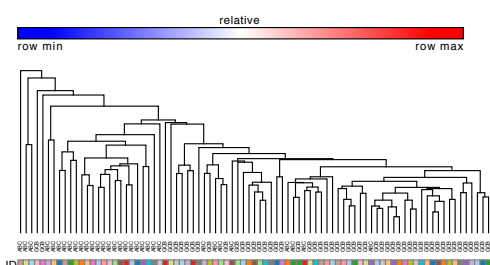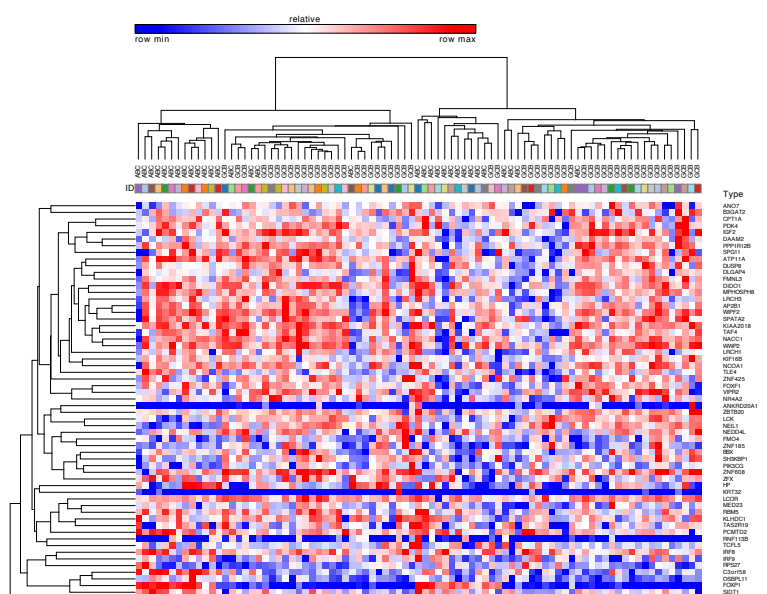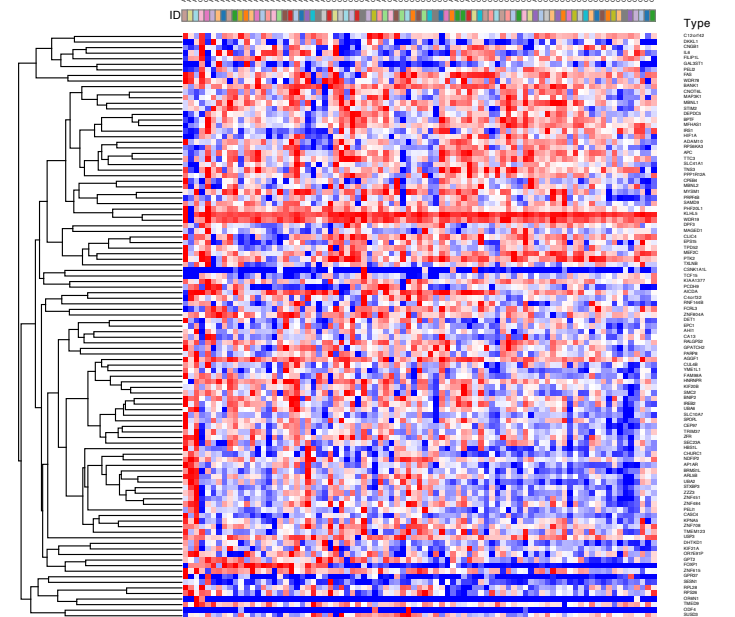

**Below:** Enriched Gene set #5 Downregulated genes compared with GCB primary DLBCL expression  
**Left:** Enriched Gene set #5 Downregulated genes compared with ABC primary DLBCL expression

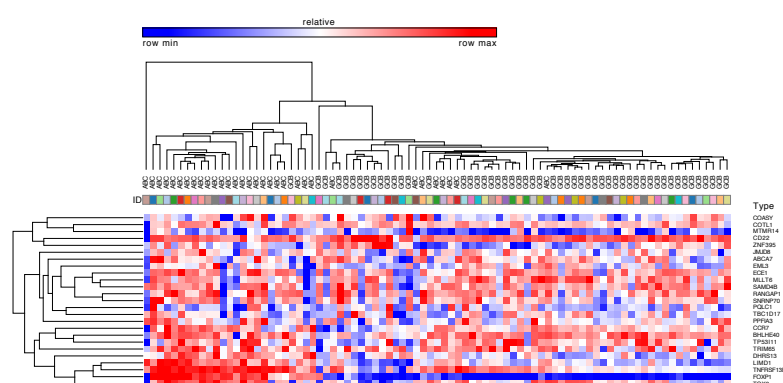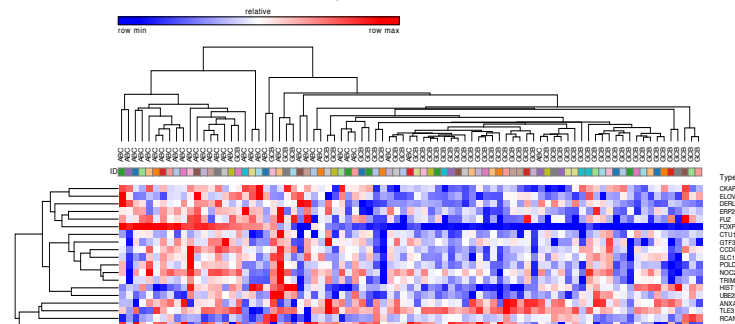

**Below:** Enriched Gene set #5 Upregulated genes compared with ABC primary DLBCL expression  
**Right:** Enriched Gene set #5 Upregulated genes compared with GCB primary DLBCL expression

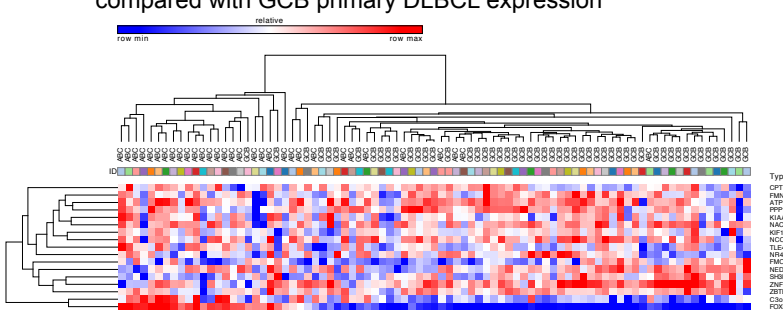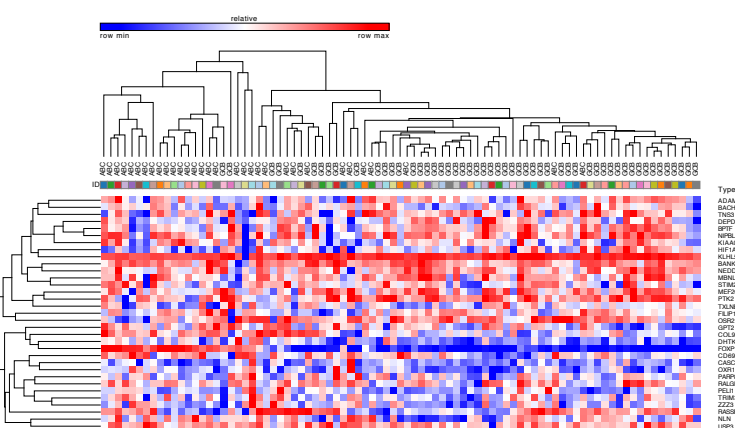

**Figure S11 (cont):** Primary DLBCL expression for each gene from GSEA derived gene lists (Fig. 7B) were compared to ABC or GCB primary expression (dbGaP: accession number: phs000235) and then hierarchically clustered by expression to determine the ability of each FOXP1 target gene set to segregate ABC from GCB subtypes. Genes were also hierarchically clustered along the x axis. Gene lists are zoomable or available in Table S3.

## NF- $\kappa$ B

ARF3 BAX BCL2L1  
CASC4 CCNL1 CCR7 CD22  
CD69 CDCA7L CTU1  
ECE1 FCRL2 GADD45B IL6  
JMJD8 LAT2 MAN2B1  
MCCC2 MEPCE MYC  
NAGPA NAP1L1 NFATC2  
NOVA1 PLK3 PRMT1 RAC2  
SCARB1 SLC38A5 SPATA2  
STK35 STXBP3 TNF  
TRAF3IP3 TSR2 VPS53  
YME1L1 ZNF395

## MYD88

ARFGAP1 CCDC86 CCR7  
CD22 CD69 CTU1 FKBP4  
GADD45B HMBS IL6 JAK3  
KCTD17 LAT2 NOC2L  
PLK3 POLD1 PRR7 PRRG2  
RAI1 RUNX1 SCARB1  
SLC1A5 SLC1A5 SNRNP70  
SNRPF TIMM13 TLE3 TNF  
TNFRSF13B TRIM65 TSR2  
TUB UBE2S

## JAK-STAT

ACAD10 ADAM15 AKT1 ANKLE1  
AP1B1 APH1A ARFGAP1 ATAD3B  
ATM BAX BCL2L1 CAMKK2  
CCDC86 CD22 CHMP4B CNOT6L  
CNP CTU1 DCAF10 DDX54 DIAPH3  
ECE1 EIF2S1 ERF FAM126B  
FAM98A FKBP4 FOSL2 FOXK1  
FUT8 GADD45B GANAB GGT3P  
GPT2 GRAP HES1 HMBS  
IGHMBP2 IRF2BP2 KCTD17 KHSRP  
KIAA0020 LAT2 LIMD1 LPP LZTR1  
MAN2B1 MAPK12 MBNL1 MICALL1  
MPHOSPH8 MYC NAA25 NEDD9  
NLN NLRC5 NOC2L PHLDA3  
PKMYT1 PM20D2 POLD2 PQLC1  
PRELID2 PRNP PRPS1 PRR7  
PUS1 RANGAP1 RXRA RXRA  
SBNO1 SCARB1 SH2B1 SH3BP2  
SIRT6 SLC1A5 SLC38A5 SLC5A3  
SLMAP SNRNP70 SSBP4 STK35  
TACC1 TBC1D17 TLE4 TMED9  
TMEM44 TNF TNPO1 TOX2  
TP53I13 TRIM14 TRIM28 TSR2  
TTC3 UBA6 VASH2 WDR12  
ZMYND8

**Figure S12.** Genes contained within GSEA derived gene lists were identified in NF $\kappa$ B, MYD88, and JAK-STAT gene signatures (10).
